# Supplementary material for: A Fyn biosensor reveals pulsatile, spatially localized kinase activity and signaling crosstalk in live mammalian cells
Source: eLife. 2020 Feb 4;9:e50571. doi: 10.7554/eLife.50571 (PMC7000222; doi:10.7554/eLife.50571)
Supplement: Figure 1—source data 1. [file elife-50571-fig1-data1.xlsx]

## Sheet: Figure 1-source data 1  
	Figure 1-source data 1			Analysis of F29 binding to Fyn-SH3
			F
		Bound Protein (a.u.)
	Fyn SH3 (nM)	Set 1	Set 2	Set 3	Avg	s.e.m
	0	0	0	0	0	0
	75	7443.62	7009.86	8562.98	7672.15	462.694
	100	7681.86	7235.86	9282.71	8066.81	621.452
	150	8089.69	8206.1	9408.17	8567.99	421.447
	250	8926.1	8921.52	9992.42	9280.01	356.215
	500	10392.3	10648.5	10968.7	10669.8	166.742
	750	10758.6	11105	11693.1	11185.6	272.762
	1000	10955.3	11609.8	12811.4	11792.2	543.54
	1250	12367.2	13418.9	13999.5	13261.9	477.694
