# Supplementary material for: A Fyn biosensor reveals pulsatile, spatially localized kinase activity and signaling crosstalk in live mammalian cells
Source: eLife. 2020 Feb 4;9:e50571. doi: 10.7554/eLife.50571 (PMC7000222; doi:10.7554/eLife.50571)
Supplement: Figure 2—figure supplement 3—source data 1. [file elife-50571-fig2-figsupp3-data1.xlsx]

## Sheet: Figure 2-figure supplement 3
	Figure 2-figure supplement 3-source data 1						Analysis of the extent of Fyn SH3 pulldown by F29 and its mutants
	A
	Bound Fyn intesity
	GST-F29 varients
	F29	P41A	R33A
	10392.3	2024.7	6450.86
	10648.5	3211.83	6098.48
	10368.7	5003.37	7830.16
	10825.9
	17158
Avg	11878.7	3413.3	6793.17
STDEV	2957.31	1499.52	915.183
