# Supplementary material for: A Fyn biosensor reveals pulsatile, spatially localized kinase activity and signaling crosstalk in live mammalian cells
Source: eLife. 2020 Feb 4;9:e50571. doi: 10.7554/eLife.50571 (PMC7000222; doi:10.7554/eLife.50571)
Supplement: Figure 3—figure supplement 2—source data 1. [file elife-50571-fig3-figsupp2-data1.xlsx]

## Sheet: Figure3-figure supplement 2
			Figure 3-figure supplement 2- source data 1					Analysis of autocatalytic activity of labeled and unlabeled Fyn
										B
										Unlabelled FynWT	mCer-Fyn WT
										0.748101	0.777764
										0.693506	0.686523
										0.65415	0.603097
									Avg	0.698586	0.689128
									STDEV	0.0471814	0.0873628
