# Supplementary material for: A Fyn biosensor reveals pulsatile, spatially localized kinase activity and signaling crosstalk in live mammalian cells
Source: eLife. 2020 Feb 4;9:e50571. doi: 10.7554/eLife.50571 (PMC7000222; doi:10.7554/eLife.50571)
Supplement: Figure 3—figure supplement 4—source data 1. [file elife-50571-fig3-figsupp4-data1.xlsx]

## Sheet: Figure 3 figure supplement 4
		Figure 3-figure supplement 4- source data 1						Quantification of protein levels of Fyn,c-Src and c-Yes in HEK293T Fyn knock-down cells
						A II				B II							C II
						Band Intensity (with Anti-Fyn antibody) compared to control				Band Intensity (with Anti-Src antibody) compared to control							Band Intensity (with Anti-Yes antibody) compared to control
						Scrambled sh-RNA control	Fyn Sh-RNA				Scrambled sh-RNA control	Fyn Sh-RNA					Scrambled sh-RNA control	Fyn Sh-RNA
						100	11.72				100	104.192					100	98.06
						100	30.91				100	85.2913					100	116.92
						100	23.07				100	78.6039					100	111
						100	27.61				100	86.9796					100	117.535
						100	17				100	138					100	87.3073
						100	29			Avg	100	98.6134					100	85
					Avg	100	23.2183			STDEV	0	23.9564				Avg	100	102.637
					STDEV	0	7.52034									STDEV	0	14.5801
