# Supplementary material for: A Fyn biosensor reveals pulsatile, spatially localized kinase activity and signaling crosstalk in live mammalian cells
Source: eLife. 2020 Feb 4;9:e50571. doi: 10.7554/eLife.50571 (PMC7000222; doi:10.7554/eLife.50571)
Supplement: Figure 3—figure supplement 5—source data 1. [file elife-50571-fig3-figsupp5-data1.xlsx]

## Sheet: Figure 3-figure supplement 5
		Figure 3-figure supplement 5- source data 1						Quantification of phosphorylated and total ERK levels in HEK293T cells
											C
											phospho/ Total ERK
											Sh-Ctrl	Fyn KD	KD-Vector	KD-Unlab Fyn	KD-Lab-Fyn
											2.06401	1	1	1.42728	1.94886
											1.59986	1	1	1.13261	1.46327
											1.89832	1	1	1.21494	1.68674
										Avg	1.85407	1	1	1.25828	1.69962
										STDEV	0.235221	0	0	0.152041	0.243052
