# Supplementary material for: A Fyn biosensor reveals pulsatile, spatially localized kinase activity and signaling crosstalk in live mammalian cells
Source: eLife. 2020 Feb 4;9:e50571. doi: 10.7554/eLife.50571 (PMC7000222; doi:10.7554/eLife.50571)
Supplement: Figure 3—figure supplement 5—source data 2. [file elife-50571-fig3-figsupp5-data2.xlsx]

## Sheet: Figure 3-figure supplement 5
		Figure 3-figure supplement 5- source data 2						Quantification of phosphorylated and total ERK levels as a function of Fyn expression in HEK293T cells
																			D
																			phospho/ Total ERK normalized to Fyn Expression
																				Unlabelled Fyn	mCer-Fyn
																				0.512577	0.452261
																				0.627243	0.52815
																				0.440708	0.323043
																			Avg	0.526843	0.434484
																			STDEV	0.0940822	0.103703
