# Supplementary material for: A Fyn biosensor reveals pulsatile, spatially localized kinase activity and signaling crosstalk in live mammalian cells
Source: eLife. 2020 Feb 4;9:e50571. doi: 10.7554/eLife.50571 (PMC7000222; doi:10.7554/eLife.50571)
Supplement: Figure 3—figure supplement 6—source data 1. [file elife-50571-fig3-figsupp6-data1.xlsx]

## Sheet: Figure 3-figure supplement 6
Figure 3-figure supplement 6- source data 1						Quantification of levels of total and active Fyn in U2OS cells
						A							B II
						Fold Band Intensity (a.u.)							Normalized band intensity ratio (pTyr-416/ total Fyn)
							Endogenous Fyn	mCer-Fyn						mCer-Fyn	FynSensor
						(I)	1	2.70914						1.22783	1.0946
						(II)	1	2.00665						1.22486	1.05925
						(III)	1	2.41529						0.995728	1.18965
						(IV)	1	1.86913						1.17839	1.10772
						(V)	1	1.92187						1.00043	0.891875
						Avg	1	2.18442					Avg	1.12545	1.06862
						STDEV	0	0.363516					STDEV	0.117925	0.109747
