# Supplementary material for: A Fyn biosensor reveals pulsatile, spatially localized kinase activity and signaling crosstalk in live mammalian cells
Source: eLife. 2020 Feb 4;9:e50571. doi: 10.7554/eLife.50571 (PMC7000222; doi:10.7554/eLife.50571)
Supplement: Figure 3—figure supplement 7—source data 1. [file elife-50571-fig3-figsupp7-data1.xlsx]

## Sheet: figure 3-figure supplement 7
	Figure 3-figure supplement 7- source data 1							Quantification of cell-perimeter and area in FynSensor expressing cells
								Cumulative time-averaged change in cell area [y-axis]*				Cumulative time-averaged change in cell perimeter [y-axis]#
								FynSensor(n=8 cells)	Control(n=11 cells)	Binder only(n=10 cells)		FynSensor(n=8 cells)	Control(n=11 cells)	Binder only (n=10 cells)
								0.0202876	0.0177087	0.0252439		0.00695656	0.015233	0.0159115
								0.01858	0.0303542	0.0226073		0.0116746	0.0178196	0.00893971
								0.0230811	0.0193253	0.00816612		0.0122329	0.00917175	0.00452489
								0.0262548	0.0185505	0.023875		0.0127626	0.00871042	0.0111585
								0.0283012	0.0209841	0.0168762		0.0306012	0.0153474	0.0114249
								0.0335447	0.0224198	0.021617		0.026676	0.0124315	0.0151199
								0.0154688	0.0172717	0.0307408		0.00988545	0.00963297	0.0107258
								0.0227622	0.0259367	0.033842		0.0222973	0.0154473	0.0238131
									0.0213869	0.0331019			0.0116846	0.016318
									0.0257813	0.022869			0.0234983	0.0109511
							Avg	0.0235351	0.0215689	0.022871		0.0166358	0.0129742	0.0127023
							s.e.m	0.002	0.0013	0.0024		0.003	0.0014	0.0016
								*average of change in cell area between ith and (i+1)th frame (total time frames=60)				#average of change in cell perimeter between ith and (i+1)th frame(total time frames=60
