# Supplementary material for: A Fyn biosensor reveals pulsatile, spatially localized kinase activity and signaling crosstalk in live mammalian cells
Source: eLife. 2020 Feb 4;9:e50571. doi: 10.7554/eLife.50571 (PMC7000222; doi:10.7554/eLife.50571)
Supplement: Figure 3—figure supplement 9—source data 1. [file elife-50571-fig3-figsupp9-data1.xlsx]

## Sheet: Figure 3-figure supplement 9
	Figure 3-figure supplement 9- source data 1						Quantification of labeled Fyn expression levels in Fyn-KD HEK 293T cells relative to endogenous kinase levels in control cells
							B
								Intensity (a.u.)
								Control	Unlabeled Fyn WT	Fyn Sensor WT
								695	1022	1259
								733	659	620
								719	945	1017
								643	932	1317
								795	1277	893
								729	1180	832
								698	1111.59	1159
								761	741	630
								848	1016	863
								784	1016	802
								766		646
							Avg	742.818	989.959	912.545
							s.e.m	16.91	58.93	74.66
