# Supplementary material for: A Fyn biosensor reveals pulsatile, spatially localized kinase activity and signaling crosstalk in live mammalian cells
Source: eLife. 2020 Feb 4;9:e50571. doi: 10.7554/eLife.50571 (PMC7000222; doi:10.7554/eLife.50571)
Supplement: Figure 3—figure supplement 10—source data 1. [file elife-50571-fig3-figsupp10-data1.xlsx]

## Sheet: Figure 3-figure supplement 10
		Figure 3-figure supplement 10- source data 1						Quantification of phophorylated and total ERK levels in FynSesnor expressing U2OS cells
					B									C
					phospho/Total ERK Band intesity										Fold Intensity (mVenus fluorescence)
					vector	myr-mVenus	myr-mVenus-F29	mCer-Fyn	FynSensor						myr-mVenus	myr-mVenus-F29	FynSensor
					100	86.9613	94.2944	101.024	82.776						100	93.3	99.69
					100	113.063	103.553	119.129	106.127						100	114.4	112.2
					100	114.617	111.109	111.847	103.928						100	94.2	145.67
					100	103.707	61.2602	60.9494	71.462					Avg	100	100.633	119.187
				Avg	100	104.587	92.5544	98.2375	91.0731					s.e.m	0	6.88	9.7
				s.e.m	0	6.35	10.98	12.97	8.39
