# Supplementary material for: A Fyn biosensor reveals pulsatile, spatially localized kinase activity and signaling crosstalk in live mammalian cells
Source: eLife. 2020 Feb 4;9:e50571. doi: 10.7554/eLife.50571 (PMC7000222; doi:10.7554/eLife.50571)
Supplement: Figure 3—figure supplement 11—source data 1. [file elife-50571-fig3-figsupp11-data1.xlsx]

## Sheet: Figure 3-figure supplement 11
		Figure 3-figure supplement 11- source data 1						Quantification of phosphorylated and total ERK levels in FynSensor expressing C2C12 cells
								A
								Fold Band Intensity (a.u.)					C
									Endogenous Fyn	mCer-Fyn
								(I)	1	1.59594			phospho/Total ERK Band intesity
								(II)	1	1.70858			vector	myr-mVenus	myr-mVenus-F29	mCer-Fyn	FynSensor
								(III)	1	1.626			100	115.124	123.385	113.153	98.4192
								(IV)	1	1.53481			100	118.55	125.859	135.282	138.53
								(V)	1	1.54564			100		100.791	134.204	127.672
								Avg	1	1.6022		Avg	100	116.837	116.678	127.546	121.54
								STDEV	0	0.062709		STDEV	0	2.42234	13.814	12.4766	20.7464
