# Supplementary material for: A Fyn biosensor reveals pulsatile, spatially localized kinase activity and signaling crosstalk in live mammalian cells
Source: eLife. 2020 Feb 4;9:e50571. doi: 10.7554/eLife.50571 (PMC7000222; doi:10.7554/eLife.50571)
Supplement: Figure 3—source data 1. [file elife-50571-fig3-data1.xlsx]

## Sheet:  Figure 3-Source data 1
			Figure 3-source data 1					Ananlysis of F29 pulldown of Fyn and its constitutively active CA mutant
							A (II)
							Fyn Kinase
							WT	CA
							100	164.863
							100	224.033
							100	189.243
							100	155
							100	225
						AVG	100	191.628
						STDEV	0	32.5094
