# Supplementary material for: A Fyn biosensor reveals pulsatile, spatially localized kinase activity and signaling crosstalk in live mammalian cells
Source: eLife. 2020 Feb 4;9:e50571. doi: 10.7554/eLife.50571 (PMC7000222; doi:10.7554/eLife.50571)
Supplement: Figure 3—source data 2. [file elife-50571-fig3-data2.xlsx]

## Sheet:  Figure 3-source data 2
		Figure 3-source data 2					Analysis of FynSensor FRET efficiency with changing the cellular levels of acceptor F29 and non-binding control
							D left inset
								Fold change in FRET efficiency
								Donor WT & mVen-F29			Donor WT & mVen-F29 P41A
							DNA molar ratio	set1	set 2	set 3	set1	set 2	set 3
							01:01:00	1	1	1	1	1	1
							01:02:00	1.41654	1.40633	1.52143	0.979623	1.06533	1.03748
							01:04:00	1.60296	1.57882	1.69133	1.03412	1.11983	1.09388
							01:06:00	1.55849	1.65369	1.67039	1.02947	1.05284	1.12592
