# Supplementary material for: A Fyn biosensor reveals pulsatile, spatially localized kinase activity and signaling crosstalk in live mammalian cells
Source: eLife. 2020 Feb 4;9:e50571. doi: 10.7554/eLife.50571 (PMC7000222; doi:10.7554/eLife.50571)
Supplement: Figure 3—source data 3. [file elife-50571-fig3-data3.xlsx]

## Sheet: Figure 3-source data 3
			Figure 3-source data 3				Analysis of FynSensor FRET response towards wt Fyn and constitutively active (CA) Fyn
										D right inset
									FRET efficiency
										WT	CA
										0.406011	0.531682
										0.402782	0.539182
										0.395313	0.544329
									AVG	0.401369	0.538398
									STDEV	0.00548746	0.00636001
