# Supplementary material for: A Fyn biosensor reveals pulsatile, spatially localized kinase activity and signaling crosstalk in live mammalian cells
Source: eLife. 2020 Feb 4;9:e50571. doi: 10.7554/eLife.50571 (PMC7000222; doi:10.7554/eLife.50571)
Supplement: Figure 3—source data 4. [file elife-50571-fig3-data4.xlsx]

## Sheet: Figure 3-source data 4
			Figure 3-source data 4					Analysis of biosensor FRET efficiency observed with various labeled F29 and non-binding constructs
									E (II)
									FRET effieicency
									FRET Donor and Acceptor varients
									acceptor (F29)	myr-acceptor	acceptor (F29P41A)	myr-acceptor (F29P41A)
									0.432434	0.515685	0.320492	0.311204
									0.43975	0.496071	0.302583	0.295367
									0.440134	0.51335	0.331219	0.284319
									0.437288	0.498115	0.333339	0.299756
