# Supplementary material for: A Fyn biosensor reveals pulsatile, spatially localized kinase activity and signaling crosstalk in live mammalian cells
Source: eLife. 2020 Feb 4;9:e50571. doi: 10.7554/eLife.50571 (PMC7000222; doi:10.7554/eLife.50571)
Supplement: Figure 4—figure supplement 1—source data 1. [file elife-50571-fig4-figsupp1-data1.xlsx]

## Sheet: Figure 4-figure supplement 1
	Figure 4-figure supplement 1-Source data 1						Quantification of donor fluorescence recovery after acceptor photo-bleaching in cells treated with SFK inhibitor
														Fold recovery of donor fluorescence
DMSO treated					SU6656 treated				untreated					Distance from cell periphery (a.u)[x-axis]	DMSO treated	s.e.m	SU6656 treated	s.e.m	untreated	s.e.m
cell-1	cell-2	cell-3	cell-4		cell-1	cell-2	cell-3		cell-1	cell-2	cell-3
0.236669	0.230783	0.207884	0.205438		0.0406698	0.0878996	0.0290162		0.242071	0.22575	0.230783			4	0.2202	0.0079206	0.0525	0.018	0.2329	0.0048254
0.237723	0.184168	0.223945	0.170629		0.0271411	0.077772	0.0291628		0.230635	0.217856	0.184168			5	0.2041	0.0159	0.0447	0.0166	0.2109	0.0139
0.243099	0.157506	0.226034	0.167867		0.0196459	0.0763347	0.0103785		0.229248	0.211284	0.157506			6	0.1986	0.0211	0.0355	0.0206	0.1993	0.0216
0.235316	0.128707	0.188465	0.160937		0.0187523	0.0706623	-0.000283169		0.21282	0.181833	0.128707			7	0.1784	0.0226	0.0297	0.0212	0.1745	0.0246
0.237814	0.117267	0.194443	0.147755		0.0272108	0.0719237	-0.00362491		0.197565	0.180777	0.117267			8	0.1743	0.0265	0.0318	0.0219	0.1652	0.0245
0.225148	0.0961064	0.192839	0.132371		0.0363162	0.0771255	-0.00156705		0.202531	0.155871	0.0961064			9	0.1616	0.0291	0.0373	0.0227	0.1515	0.0308
0.229737	0.0999947	0.191727	0.127517		0.0339794	0.0643734	-0.00935571		0.212827	0.167546	0.0999947			10	0.1622	0.0296	0.0297	0.0214	0.1601	0.0328
0.225806	0.0845769	0.179864	0.122544		0.0281181	0.0586771	-0.00961436		0.216785	0.16905	0.0845769			11	0.1532	0.0311	0.0257	0.0198	0.1568	0.0387
0.211108	0.0717683	0.177215	0.113494		0.0259599	0.0626866	-0.0134212		0.211515	0.159183	0.0717683			12	0.1434	0.0313	0.0251	0.022	0.1475	0.0408
0.222746	0.0716203	0.169917	0.117357		0.0364807	0.0562476	-0.0196609		0.208689	0.1439	0.0716203			13	0.1454	0.0327	0.0244	0.0227	0.1414	0.0396
0.222083	0.0623229	0.14454	0.115183		0.0295714	0.0576784	-0.0153416		0.197609	0.139528	0.0623229			14	0.136	0.0333	0.024	0.0213	0.1332	0.0392
0.225023	0.0551383	0.152044	0.130976		0.0361931	0.0514666	-0.0169822		0.195984	0.138892	0.0551383			15	0.1408	0.0349	0.0236	0.0207	0.13	0.0409
0.229993	0.0532532	0.147705	0.124669		0.0345342	0.0553897	-0.0162418		0.183118	0.134633	0.0532532			16	0.1389	0.0364	0.0246	0.0213	0.1237	0.0379
0.234994	0.0492278	0.121277	0.132965		0.0398877	0.0481933	-0.0123788		0.171377	0.129537	0.0492278			17	0.1346	0.0382	0.0252	0.019	0.1167	0.0358
0.233814	0.0450642	0.0940582	0.123113		0.0348405	0.0437527	-0.0074963		0.170655	0.129107	0.0450642			18	0.124	0.04	0.0237	0.0158	0.1149	0.0369
0.22539	0.0474766	0.0938705	0.127336		0.0348565	0.0536953	-0.0025492		0.173761	0.150045	0.0474766			19	0.1235	0.0377	0.0287	0.0165	0.1238	0.0388
0.217633	0.0619787	0.0917406	0.128723		0.0324812	0.0486952	-0.00665847		0.159819	0.141489	0.0619787			20	0.125	0.0338	0.0248	0.0164	0.1211	0.03
0.203963	0.0550952	0.100317	0.123641		0.0412209	0.0478164	-0.00224484		0.16485	0.131527	0.0550952			21	0.1208	0.0312	0.0289	0.0157	0.1172	0.0325
0.210668	0.0531541	0.0938871	0.120533		0.0343129	0.0500594	0.00644744		0.174756	0.141726	0.0531541			22	0.1196	0.0334	0.0303	0.0128	0.1232	0.0363
0.220376	0.0613632	0.08928	0.130345		0.0328708	0.0563537	0.0141245		0.181229	0.149821	0.0613632			23	0.1253	0.0347	0.0344	0.0122	0.1308	0.0359
0.217539	0.0555241	0.0988168	0.127662		0.0338016	0.0552713	0.0143686		0.178808	0.16029	0.0555241			24	0.1249	0.0343	0.0345	0.0118	0.1315	0.0384
0.205316	0.0536897	0.0943061	0.126418		0.0330881	0.0510892	0.0245838		0.169946	0.147795	0.0536897			25	0.1199	0.0321	0.0363	0.0078134	0.1238	0.0356
0.213032	0.0636094	0.0947184	0.128997		0.0259713	0.0524826	0.0336701		0.171185	0.135866	0.0636094			26	0.1251	0.0322	0.0374	0.0078741	0.1236	0.0317
0.214916	0.0565119	0.0973228	0.125294		0.0308842	0.0572996	0.0405636		0.170471	0.124696	0.0565119			27	0.1235	0.0336	0.0429	0.0077156	0.1172	0.0331
0.213533	0.0534876	0.0992296	0.0977787		0.0286987	0.0524458	0.0497779		0.176785	0.138245	0.0534876			28	0.116	0.0342	0.0436	0.0075106	0.1228	0.0364
0.204359	0.0541143	0.107518	0.0909235		0.0314817	0.0515587	0.0493688		0.173258	0.135983	0.0541143			29	0.1142	0.032	0.0441	0.0063589	0.1211	0.0352
0.203623	0.0529279	0.0987188	0.0881856		0.0380378	0.0524591	0.0554372		0.176742	0.136595	0.0529279			30	0.1109	0.0324	0.0486	0.0053727	0.1221	0.0365
0.205244	0.0522034	0.115308	0.0842365		0.033861	0.0496476	0.0644057		0.181082	0.138082	0.0522034			31	0.1142	0.033	0.0493	0.0088192	0.1238	0.0379
0.21408	0.0499821	0.1111	0.0886569		0.0299444	0.0535173	0.0661274		0.182267	0.136008	0.0499821			32	0.116	0.0351	0.0499	0.0106	0.1228	0.0388
0.207181	0.0592	0.112636	0.0826232		0.0324829	0.0515836	0.0721767		0.192206	0.125308	0.0592			33	0.1154	0.0325	0.0521	0.0115	0.1256	0.0384
0.210267	0.0600704	0.113506	0.0816591		0.0374012	0.0495021	0.0729835		0.184837	0.116002	0.0600704			34	0.1164	0.0332	0.0533	0.0104	0.1203	0.0361
0.219989	0.0640008	0.129531	0.076754		0.0345951	0.0448525	0.0726406		0.177286	0.12448	0.0640008			35	0.1226	0.0354	0.0507	0.0114	0.1219	0.0327
0.209556	0.0653799	0.113279	0.0856832		0.0285345	0.044149	0.0697474		0.183767	0.117855	0.0653799			36	0.1185	0.0319	0.0475	0.012	0.1223	0.0342
0.204417	0.0649605	0.110302	0.0954574		0.0287387	0.0421445	0.071212		0.182026	0.117805	0.0649605			37	0.1188	0.0301	0.0474	0.0125	0.1216	0.0338
0.199728	0.0721094	0.123479	0.107044		0.0311898	0.035453	0.0706748		0.176445	0.114809	0.0721094			38	0.1256	0.0269	0.0458	0.0125	0.1211	0.0303
0.203818	0.0817858	0.126427	0.102612		0.0319715	0.0325053	0.0788244		0.183447	0.120822	0.0817858			39	0.1287	0.0267	0.0478	0.0155	0.1287	0.0296
0.208191	0.0811127	0.117671	0.105004		0.0285332	0.0312979	0.0792326		0.182262	0.115563	0.0811127			40	0.128	0.0278	0.0464	0.0165	0.1263	0.0297
0.199677	0.0889672	0.136448	0.112623		0.0315637	0.0415266	0.0801746		0.179551	0.113566	0.0889672			41	0.1344	0.0238	0.0511	0.0148	0.1274	0.027
0.200499	0.0739762	0.12674	0.111454		0.0294304	0.0410104	0.0744097		0.183189	0.130639	0.0739762			42	0.1282	0.0265	0.0483	0.0135	0.1293	0.0315
0.192686	0.0721707	0.146316	0.103997		0.036437	0.0344522	0.0631675		0.170831	0.122029	0.0721707			43	0.1288	0.0262	0.0447	0.0092587	0.1217	0.0285
0.183344	0.0697858	0.143409	0.106468		0.030473	0.043056	0.0530077		0.173192	0.119771	0.0697858			44	0.1258	0.0244	0.0422	0.00652	0.1209	0.0299
0.185486	0.0614555	0.131822	0.108425		0.0304621	0.0442588	0.0456524		0.170168	0.114621	0.0614555			45	0.1218	0.0258	0.0401	0.0048479	0.1154	0.0314
0.18389	0.049194	0.141661	0.0969418		0.0315823	0.0458956	0.0365674		0.154051	0.11831	0.049194			46	0.1179	0.029	0.038	0.0041948	0.1072	0.0308
0.188745	0.0531993	0.140933	0.0861406		0.0360636	0.0385075	0.0327509		0.162454	0.123425	0.0531993			47	0.1173	0.0299	0.0358	0.0016681	0.113	0.032
0.191319	0.0625242	0.133109	0.0923292		0.0281338	0.0368372	0.0251174		0.159663	0.142287	0.0625242			48	0.1198	0.0279	0.03	0.0035135	0.1215	0.0299
0.201607	0.0588158	0.128837	0.0731098		0.0231959	0.0370631	0.0224157		0.158665	0.141437	0.0588158			49	0.1156	0.0324	0.0276	0.0047578	0.1196	0.0308
0.192952	0.0610456	0.128414	0.0935439		0.0238631	0.0414588	0.0200043		0.162011	0.122964	0.0610456			50	0.119	0.0282	0.0284	0.006603	0.1153	0.0294
