# Supplementary material for: A Fyn biosensor reveals pulsatile, spatially localized kinase activity and signaling crosstalk in live mammalian cells
Source: eLife. 2020 Feb 4;9:e50571. doi: 10.7554/eLife.50571 (PMC7000222; doi:10.7554/eLife.50571)
Supplement: Figure 4—source data 1. [file elife-50571-fig4-data1.xlsx]

## Sheet: Figure 4-Source data file 1
	Figure 4-Source data 1		Light dosage-dependence of donor fluorescence recovery in acceptor photo-bleaching experiment with F29 biosensor
	B
	Distance from cell periphery(a.u)[x-axis]	Donor Fluorescence Recovery (%)[y-axis]
		2X	2X-s.e.m	5X	5X-s.e.m	10X	10X-s.e.m
	4	2.6843	0.6535	6.7131	0.7917	12.6417	0.8665
	5	2.8608	0.3426	7.2339	1.1184	11.3427	0.77
	6	2.9564	0.354	6.7502	1.3654	10.5334	0.7808
	7	2.5703	0.4517	6.223	1.2683	9.5541	0.7988
	8	1.942	0.3742	5.3148	0.9618	8.9469	0.676
	9	1.6755	0.3815	4.9366	0.7618	8.3701	0.6173
	10	1.8843	0.5752	4.9737	0.576	7.8881	0.6333
	11	1.6292	0.4937	4.6465	0.5053	7.3276	0.7039
	12	1.1348	0.5799	4.1998	0.5449	7.2992	0.716
	13	1.3732	0.5314	4.2456	0.7115	7.6287	0.7514
	14	1.2167	0.3403	4.2655	0.7131	7.4915	0.7725
	15	0.9181	0.4758	3.8505	0.6189	7.1749	0.6995
	16	1.035	0.4432	3.5317	0.5379	7.4063	0.7213
	17	1.4549	0.4812	3.3665	0.3977	6.9295	0.7602
	18	1.285	0.5017	3.2819	0.4427	7.0602	0.7276
	19	0.9085	0.5566	3.3546	0.5687	7.0091	0.7417
	20	1.0874	0.636	3.7868	0.5302	7.1396	0.8527
	21	1.6464	0.6956	4.1675	0.4091	7.3219	0.8164
	22	1.6144	0.7914	3.9442	0.455	6.7086	0.7905
	23	1.7016	0.6864	4.2807	0.4368	6.9462	0.821
	24	1.185	0.629	4.2007	0.3975	6.9735	0.838
	25	1.2966	0.5494	3.7868	0.3596	6.9726	0.8073
	26	1.16	0.5908	4.0681	0.372	7.0669	0.8594
	27	0.8729	0.6339	3.9755	0.3362	7.3697	0.7236
	28	0.6679	0.667	4.1569	0.4834	6.9775	0.7913
	29	0.9922	0.6212	4.215	0.5537	6.9927	0.8443
	30	1.6191	0.7275	4.0102	0.553	6.8691	0.7681
	31	1.3423	0.7387	4.2478	0.6046	6.9988	0.8022
	32	1.4363	0.596	3.8653	0.4027	6.9429	0.7959
	33	1.4742	0.5972	3.8902	0.4815	7.0024	0.8437
	34	1.272	0.7304	4.0049	0.4964	6.9296	0.852
	35	1.442	0.6583	4.1445	0.541	6.5519	0.7811
	36	1.3138	0.6909	3.9739	0.3879	6.5571	0.7264
	37	1.2803	0.8018	4.1178	0.3925	6.6892	0.8141
	38	1.4014	0.4768	3.8257	0.311	6.7539	0.8508
	39	1.4995	0.7436	3.761	0.4504	6.5836	0.8539
	40	1.5498	0.8215	3.5603	0.4481	6.7508	0.9285
	41	1.137	0.7973	4.0638	0.3948	6.7278	0.8832
	42	1.0697	0.6365	4.0625	0.399	6.1958	0.8043
	43	1.2912	0.642	4.1567	0.3694	6.31	0.7446
	44	1.6281	0.6036	4.138	0.3906	6.2064	0.7842
	45	0.9507	0.5694	3.9128	0.4254	6.5923	0.7487
	46	1.4563	0.7094	4.2283	0.5308	6.3987	0.7057
	47	1.4653	0.5786	4.0563	0.4464	6.3695	0.799
	48	1.686	0.5822	3.9475	0.415	6.4336	0.7782
	49	1.5875	0.4713	3.8847	0.3963	6.466	0.8754
	50	1.7229	0.5521	3.8613	0.4437	5.9549	0.8402
