# Supplementary material for: A Fyn biosensor reveals pulsatile, spatially localized kinase activity and signaling crosstalk in live mammalian cells
Source: eLife. 2020 Feb 4;9:e50571. doi: 10.7554/eLife.50571 (PMC7000222; doi:10.7554/eLife.50571)
Supplement: Figure 4—source data 2. [file elife-50571-fig4-data2.xlsx]

## Sheet: Figure 4-Source data file 2
	Figure 4-Source data 2		Light dosage-dependence of donor fluorescence recovery in acceptor photo-bleaching experiment with F29 biosensor and non-binding mutant
											C
											Donor Fluorescence Recovery (%)[y-axis] (@distance 4-50 a.u from cell periphery)
										Laser Power[x-axis]->	10X		5X		2X
											F29	P41A	F29	P41A	F29	P41A
											8.9469	1.38632	5.3148	0.654042	1.942	1.00343
											8.3701	0.390278	4.9366	0.599395	1.6755	0.581035
											7.8881	0.205664	4.9737	0.538149	1.8843	-0.272693
											7.3276	-0.0784231	4.6465	0.72431	1.6292	-1.09894
											7.2992	-0.669542	4.1998	0.740531	1.1348	-0.849411
											7.6287	-0.775198	4.2456	0.665101	1.3732	-0.609677
											7.4915	-0.925904	4.2655	0.55429	1.2167	-0.560118
											7.1749	-1.07825	3.8505	0.521845	0.9181	-0.97914
											7.4063	-1.20826	3.5317	0.509605	1.035	-1.22345
											6.9295	-1.30471	3.3665	0.593636	1.4549	-1.34586
											7.0602	-1.03675	3.2819	0.666478	1.285	-1.49957
											7.0091	-1.21624	3.3546	0.606537	0.9085	-1.12049
											7.1396	-1.20441	3.7868	0.505541	1.0874	-1.14494
											7.3219	-1.23777	4.1675	0.609533	1.6464	-1.3175
											6.7086	-0.785636	3.9442	0.54017	1.6144	-1.2454
											6.9462	-0.928726	4.2807	0.462684	1.7016	-0.985734
											6.9735	-1.22056	4.2007	0.523785	1.185	-0.809165
											6.9726	-0.931888	3.7868	0.533447	1.2966	-0.737619
											7.0669	-0.964833	4.0681	0.539507	1.16	-0.963417
											7.3697	-1.41938	3.9755	0.58499	0.8729	-0.892892
											6.9775	-0.867314	4.1569	0.573908	0.6679	-1.14527
											6.9927	-1.07123	4.215	0.516563	0.9922	-1.25868
											6.8691	-0.816475	4.0102	0.584455	1.6191	-1.32895
											6.9988	-0.599105	4.2478	0.606805	1.3423	-0.665879
											6.9429	-0.355142	3.8653	0.561523	1.4363	-0.839507
											7.0024	-1.05956	3.8902	0.486033	1.4742	-0.963074
											6.9296	-0.922702	4.0049	0.544186	1.272	-1.11699
											6.5519	-0.483125	4.1445	0.509633	1.442	-0.70885
											6.5571	-0.281914	3.9739	0.599974	1.3138	-0.523131
											6.6892	-0.0117291	4.1178	0.442329	1.2803	-0.488123
											6.7539	-0.303319	3.8257	0.454467	1.4014	-0.932858
											6.5836	-0.171012	3.761	0.505701	1.4995	-0.582337
											6.7508	-0.410869	3.5603	0.597143	1.5498	-0.514012
											6.7278	-0.210169	4.0638	0.77214	1.137	-0.224344
											6.1958	-0.149555	4.0625	0.648893	1.0697	-0.0508655
											6.31	-0.0233047	4.1567	0.567284	1.2912	0.268965
											6.2064	-0.0557762	4.138	0.55663	1.6281	0.0164903
											6.5923	0.11316	3.9128	0.591287	0.9507	-0.411222
											6.3987	0.0789543	4.2283	0.577077	1.4563	-0.483395
											6.3695	-0.366962	4.0563	0.638707	1.4653	-0.29918
											6.4336	-0.852017	3.9475	0.667255	1.686	-0.247471
											6.466	-0.694531	3.8847	0.646816	1.5875	-0.0786203
											5.9549	-0.35108	3.8613	0.788528	1.7229	0.187478
											6.3269	-0.266643	3.739	0.779794	1.4178	0.149538
											6.2163	-0.0642439	3.5468	0.774977	1.2258	0.440032
											6.5186	-0.0440124	3.6707	0.794761	1.6403	0.0834934
											6.2538	0.0590161	3.7873	0.695564	1.6319	-0.0158894
