# Supplementary material for: A Fyn biosensor reveals pulsatile, spatially localized kinase activity and signaling crosstalk in live mammalian cells
Source: eLife. 2020 Feb 4;9:e50571. doi: 10.7554/eLife.50571 (PMC7000222; doi:10.7554/eLife.50571)
Supplement: Figure 5—figure supplement 1—source data 1. [file elife-50571-fig5-figsupp1-data1.xlsx]

## Sheet: Figure 5-figure supplement-1
			Figure 5-figure supplement 1-source data 1						quantification of F29 non-binding mutant FRET levels across cell zones
											FRETT intensity(a.u)[y-axis]
										cell-zone[x-axis]->	Zone 1(Maximum FRETT)	Zone 2(Minimum FRETT)
											20.9246	12.2525
											13.6937	6.22483
											6.65944	2.87944
											3.93829	7.88268
											2.74409	4.98184
										Avg	9.59202	6.84426
										s.e.m.	3.411	1.5795
