# Supplementary material for: A Fyn biosensor reveals pulsatile, spatially localized kinase activity and signaling crosstalk in live mammalian cells
Source: eLife. 2020 Feb 4;9:e50571. doi: 10.7554/eLife.50571 (PMC7000222; doi:10.7554/eLife.50571)
Supplement: Figure 5—figure supplement 2—source data 1. [file elife-50571-fig5-figsupp2-data1.xlsx]

## Sheet: Figure 5-figure supplement 2
	Figure 5-figure supplement-2 source data 1							Quantification of FynSensor and F29 localization levels across cell
										A (II)							B(II)
										Maximum Intensity(a.u)								Intensity(a.u)[y-axis]
										FRETT		YFP ch					Distance (µm)[x-axis]	FRET	YFP
									cell-zone[x-axis]->	High intensity quadrant	Low intensity quadrant	High intensity quadrant	Low intensity quadrant				0	20.4547	66.8636
										37.0605	20.4657	101.393	109.054				0.2072	23.2727	78.7273
										43.7788	14.0196	106.879	111.404				0.4143	20.2727	82.7273
										53.4099	16.228	90.3189	94.2578				0.6215	21.0907	74.9545
										38.696	13.0934	127.124	124.311				0.8286	27.7273	75.8182
										63.3169	22.7302	69.4988	54.5335				1.0358	34.4547	80.9545
										73.916	39.8128	62.8745	63.3449				1.243	36.3633	78.2727
										26.8756	8.48867	52.1293	47.2169				1.4501	34.0907	83.4545
										66.1984	18.1106	71.4852	69.2031				1.6573	31.3633	78.7727
										112.622	46.7293	61.6922	54.1872				1.8644	37	77.4545
										54.8071	23.9361	45.0151	43.5874				2.0716	38.3633	78.5909
										39.4036	6.43417	103.531	92.6961				2.2788	34	81.7727
										106.25	45.5838	76.377	83.9667				2.4859	32.3633	82.3636
										56.5046	16.6458	94.3618	98.7036				2.6931	35.2727	96.6364
										47.5233	12.7564	41.9278	39.6414				2.9002	31.5453	77
										47.3266	12.2052	39.1527	41.8863				3.1074	29.5453	78.5
										40.0564	10.7774	36.3597	32.7707				3.3146	35.9093	74.6364
										85.9044	22.6383	113.967	112.325				3.5217	32.7273	63.6818
										47.7027	23.9597	28.0266	37.0765				3.7289	30.5453	73.3182
										83.1785	18.6706	88.0854	100.29				3.936	30.5453	78.5
										81.8033	22.1911	80.5762	81.9438				4.1432	31.6367	76.9545
										75.3656	23.0602	43.7756	50.4976				4.3504	31.7273	71.0455
										60.5337	15.1626	37.6059	35.1445				4.5575	28.5453	78.8182
										20.7585	5.54244	86.6625	80.0088				4.7647	24.0907	84.4091
										47.9665	27.5044	26.6021	26.8618				4.9718	21.818	76.9545
										31.6791	11.205	22.3455	20.0702				5.179	26.6367	76.1818
										29.9612	11.4847	74.3441	47.8072				5.3862	33	75.3182
										31.9507	3.8139	100.948	95.507				5.5933	36.818	75.4545
										32.9331	4.22617	98.7675	108.48				5.8005	33.6367	73.0455
										32.3858	14.0561	125.495	122.79				6.0076	28.3633	71.2273
										42.6405	5.90902	127.43	124.079				6.2148	25.818	71.5455
										84.2532	24.2538	55.7201	53.8005				6.422	23.9093	73.5909
										54.6505	21.5191	48.3154	49.7174				6.6291	22.182	73.9545
									Avg	54.7317	18.2254	73.0871	72.0989				6.8363	29.7273	64.9091
									S.e.m.	4.0764	1.8926	5.5513	5.6808				7.0434	33.6367	65.5
																	7.2506	31.7273	71.5455
																	7.4578	25.7273	71.1818
																	7.6649	25.5453	72.5
																	7.8721	30.5453	71.3636
																	8.0792	29.818	73.3636
																	8.2864	23.6367	71.9091
																	8.4936	25.818	73.7727
																	8.7007	32.0907	77.7727
																	8.9079	23.6367	75.2727
																	9.115	25	75.2273
																	9.3222	24.818	67.0909
																	9.5294	21.0907	71.5909
																	9.7365	27.5453	70.0909
																	9.9437	23.818	72.5
																	10.1509	20.9093	72.7273
																	10.358	24.4547	76.9091
																	10.5652	27.6367	74.5
																	10.7723	28.3633	70.0455
																	10.9795	29.2727	76.7273
																	11.1867	31.4547	79.5909
																	11.3938	31.5453	86.5909
																	11.601	29.9093	82.4545
																	11.8081	34.5453	82.5455
																	12.0153	29.182	80.2727
																	12.2225	36.6367	81.6364
																	12.4296	45.4547	77.0455
																	12.6368	39.3633	86.7727
																	12.8439	33.5453	80.6818
																	13.0511	36.5453	77.9091
																	13.2583	39.6367	82
																	13.4654	36.9093	79.9545
																	13.6726	41	80.9091
																	13.8797	45.3633	88
																	14.0869	47.5453	91.6818
																	14.2941	49	96.1818
																	14.5012	48	81.2727
																	14.7084	42.4547	88.7273
																	14.9155	36.7273	77.3636
																	15.1227	48.6367	83.4091
																	15.3299	49	80.5
																	15.537	41.5453	70.2727
																	15.7442	40.6367	69.2273
																	15.9513	48.2727	71.1364
																	16.1585	44.7273	80.9545
																	16.3657	40.5453	87.5455
																	16.5728	49	76.0909
																	16.78	43.9093	73.8636
																	16.9871	32.818	72.1364
																	17.1943	34.5453	76.7273
																	17.4015	42.4547	66.0455
																	17.6086	39.818	68.9091
																	17.8158	36.4547	70.9091
																	18.0229	38.818	71.2273
																	18.2301	40.3633	68.5
																	18.4373	38.0907	73.1818
																	18.6444	38.818	66.8182
																	18.8516	41.3633	72.6364
																	19.0587	43.5453	80.0455
																	19.2659	45.3633	86
																	19.4731	47.182	83.7727
																	19.6802	45.4547	83.9545
																	19.8874	40.7273	89.4545
																	20.0945	39.0907	85.9545
																	20.3017	47.2727	84.1818
																	20.5089	43.4547	85.2727
																	20.716	41.5453	82.2727
																	20.9232	52.182	84.2727
																	21.1303	50.3633	86
																	21.3375	42	82.7727
																	21.5447	49.7273	80.7273
																	21.7518	37.4547	84.8182
																	21.959	49.0907	82.1364
																	22.1661	49.2727	82.3182
																	22.3733	52	87.4091
																	22.5805	55	83
																	22.7876	49	72.8182
																	22.9948	46.4547	87.1818
																	23.2019	46.6367	88.7727
																	23.4091	52.9093	94.9091
																	23.6163	56.0907	87.9091
																	23.8234	44.818	81.4091
																	24.0306	39.0907	86
																	24.2377	46.818	86.3182
																	24.4449	43.9093	80.1364
																	24.6521	38.4547	86.5
																	24.8592	47.4547	77.3182
																	25.0664	45	81.2273
																	25.2735	55.182	76.2273
																	25.4807	65.818	72.4545
																	25.6879	61.3633	77.4545
																	25.895	50.9093	76.9091
																	26.1022	54.6367	77.2727
																	26.3093	60.2727	76.6818
																	26.5165	55.2727	77.8636
																	26.7237	43.6367	76.5455
																	26.9308	47.3633	71.3636
																	27.138	48.0907	79.5455
																	27.3451	51.3633	78.9545
																	27.5523	55.4547	87.0909
																	27.7595	53.6367	85.6818
																	27.9666	59.3633	86.9545
																	28.1738	75	95.4091
																	28.3809	72.182	93.5455
																	28.5881	66.9093	88.0455
																	28.7953	63.818	89.4545
																	29.0024	61.4547	91.4545
																	29.2096	56	88.8182
																	29.4167	54	91
																	29.6239	60.182	89
																	29.8311	67.2727	83.1364
																	30.0382	57.9093	91.3182
																	30.2454	55.3633	83.1818
																	30.4525	60.0907	97.6818
																	30.6597	66.6367	96.9545
																	30.8669	68.4547	93.2727
																	31.074	68.6367	91.4545
																	31.2812	69.2727	87.7273
																	31.4883	68.182	83.4091
																	31.6955	57.6367	79.9545
																	31.9027	72	74.6364
																	32.1098	67.818	85.3636
																	32.317	68.5453	86
																	32.5242	74.818	78.2273
																	32.7313	81.0907	87.5909
																	32.9385	69.6367	85.0455
																	33.1456	67.6367	80.3182
																	33.3528	67.5453	74.5909
																	33.56	68.818	80.3182
																	33.7671	73.6367	71
																	33.9743	82.2727	78.6364
																	34.1814	94	91.0909
																	34.3886	102.091	95.0909
																	34.5958	100.182	92.5
																	34.8029	88.5453	93.7273
																	35.0101	95.3633	111.5
																	35.2172	105.182	104.773
																	35.4244	114.909	94.4545
																	35.6316	110.818	93.1364
																	35.8387	100.909	93.3182
																	36.0459	102.818	94.0909
																	36.253	106.637	97.2273
																	36.4602	101.182	82.8182
																	36.6674	89.9093	78.5
																	36.8745	103.545	81.8636
																	37.0817	104	92.9545
																	37.2888	98.182	88.5909
																	37.496	98	96.9091
																	37.7032	100.545	86.9545
																	37.9103	95.0907	85.1364
																	38.1175	85.2727	87.7273
																	38.3246	102.363	93.5909
																	38.5318	117	95.9545
																	38.739	116.182	85.6364
																	38.9461	121.545	100.773
																	39.1533	118.091	93.2273
																	39.3604	121	98.8182
																	39.5676	135.091	97.3636
																	39.7748	121.455	100.454
																	39.9819	105.455	90.3636
																	40.1891	126	96.5455
																	40.3962	141.182	102.727
																	40.6034	139.455	103.318
																	40.8106	141.637	91.3636
																	41.0177	136.727	109.773
																	41.2249	138.182	102.682
																	41.432	146.091	103.046
																	41.6392	157.818	107.546
																	41.8464	156.727	104.727
																	42.0535	149.909	99.9545
																	42.2607	154	95.7727
																	42.4678	155.273	97.3636
																	42.675	158.363	100.864
																	42.8822	158.909	101.864
																	43.0893	162.363	101.091
																	43.2965	158.091	101.091
																	43.5036	157.545	109.954
																	43.7108	157.182	101.227
																	43.918	155.363	114.136
																	44.1251	157.818	109.5
																	44.3323	159	100.5
																	44.5394	153.818	108.273
																	44.7466	162.363	103.227
																	44.9538	162.182	100.864
																	45.1609	142.637	105
