# Supplementary material for: A Fyn biosensor reveals pulsatile, spatially localized kinase activity and signaling crosstalk in live mammalian cells
Source: eLife. 2020 Feb 4;9:e50571. doi: 10.7554/eLife.50571 (PMC7000222; doi:10.7554/eLife.50571)
Supplement: Figure 5—figure supplement 3—source data 1. [file elife-50571-fig5-figsupp3-data1.xlsx]

## Sheet: figure 5-figure supplement 3
					Figure 5-figure supplement 3-source data 1						Quantification of donor-normalized FRET levels in low and high activity zones
												A (II)
													CFP normalized FRET[y-axis]
												cell-zone[x-axis]->	High FRETT quad	Low FRETT quad
													0.566942	0.362228
													0.456572	0.195066
													0.523659	0.240292
													0.55996	0.318832
													0.714588	0.496936
													1.07409	0.899068
													0.348572	0.185198
													0.81182	0.405225
													1.39303	0.973465
													0.734599	0.433283
													0.47495	0.168788
													1.49478	0.974131
													0.855233	0.430445
													1.05864	0.540866
													0.774084	0.352311
													0.684442	0.345736
													0.872247	0.391568
													0.706819	0.421104
													0.4409	0.166372
													0.608351	0.280631
													0.734177	0.326162
													0.896262	0.461487
													0.363414	0.147658
													0.965097	0.709721
													0.979295	0.621409
													0.594879	0.445901
													0.466297	0.11785
													0.489192	0.115992
													0.602693	0.411408
													0.560092	0.184945
													0.784643	0.36183
													0.81652	0.443625
												AVG	0.731464	0.404048
												S.e.m.	0.04773	0.0403
