# Supplementary material for: A Fyn biosensor reveals pulsatile, spatially localized kinase activity and signaling crosstalk in live mammalian cells
Source: eLife. 2020 Feb 4;9:e50571. doi: 10.7554/eLife.50571 (PMC7000222; doi:10.7554/eLife.50571)
Supplement: Figure 5—figure supplement 3—source data 2. [file elife-50571-fig5-figsupp3-data2.xlsx]

## Sheet: Figure 5-figure supplement 3B
			Figure 5-figure supplement 3-source data 2						Comparison of FynSensor FRETT levels and fyn kinase localization at different time points
										B(I)							B(II)
											Normalized FRET intensity[y-axis]						Intensity(a.u)
										Time(minutes)[x-axis]	cell-1	cell-2	cell-3				FRETT		Fyn-CFP
										0	0.883	0.7684	1.3607				Tmax	Tmin	Tmax	Tmin
										1	0.9588	0.7346	1.3839				37.0605	24.3	65.3692	60.1982
										2	0.9273	0.8708	1.4614				51.1835	37.7835	85.8061	88.7298
										3	0.8539	0.8891	1.4948				58.7692	31.3165	69.0368	67.5434
										4	1.0242	0.808	1.4223				66.3036	40.7825	56.9633	53.9291
										5	1.0877	0.8858	1.39				56.6078	37.7669	52.319	57.1855
										6	0.8118	0.8825	1.5554				85.9044	74.3069	98.4863	93.5412
										7	0.9965	0.7483	1.4721				60.5337	36.0022	67.5401	56.6981
										8	0.9287	0.8156	1.442				47.9665	22.2612	49.7013	41.5766
										9	1.0222	0.8666	1.3927				54.6505	29.1502	68.6731	66.9309
										10	0.2645	0.6809	0.8657			AVG	57.6644	37.0744	68.2106	65.1481
																S.e.m.	4.4912	5.1108	5.2138	5.5427
