# Supplementary material for: A Fyn biosensor reveals pulsatile, spatially localized kinase activity and signaling crosstalk in live mammalian cells
Source: eLife. 2020 Feb 4;9:e50571. doi: 10.7554/eLife.50571 (PMC7000222; doi:10.7554/eLife.50571)
Supplement: Figure 5—figure supplement 4—source data 1. [file elife-50571-fig5-figsupp4-data1.xlsx]

## Sheet: Figure 5-figure supplement 4
				Figure 5-figure supplement 4-source data 1						Quantification of FRETT levels and kinase localization across selected cellular zones
											B
												Intensity(a.u)[y-axis]
												FRETT		Fyn-CFP
											cell-zone[x-axis]->	Zone 1	Zone 2	Zone 1	Zone 2
												72.7573	58.4393	71.053	87.742
												92.8487	59.1213	93.629	78.848
												107.257	52.7727	110.144	94.591
												96.6367	58.5607	91.409	98.326
												105.97	53.2273	98.629	75.462
											AVG	95.094	56.4243	92.9728	86.9938
											S.e.m.	6.2152	1.4045	6.3647	4.3933
