# Supplementary material for: A Fyn biosensor reveals pulsatile, spatially localized kinase activity and signaling crosstalk in live mammalian cells
Source: eLife. 2020 Feb 4;9:e50571. doi: 10.7554/eLife.50571 (PMC7000222; doi:10.7554/eLife.50571)
Supplement: Figure 5—source data 1. [file elife-50571-fig5-data1.xlsx]

## Sheet: Figure 5-source data-1
		Figure 5 -source data 1				Quantification of FynSensor FRET levels in low and high activity zones in U2OS cells
				A (II)
				FRETT intensity (a.u)[y-axis]
				High FRETT zone(Max-FRETT-HFQ)	Low FRETT zone(Max-FRETT-LFQ)
				17.0136	8.66225
				8.71473	1.3557
				32.385	8.88081
				22.3067	11.5045
				9.9481	1.61602
				34.1099	11.4588
				38.9583	9.4331
				33.1221	8.54494
				21.313	8.29631
				9.1328	2.41873
				29.7632	6.81048
				33.2248	3.65645
				32.5211	8.07725
				39.1117	10.0097
				24.5207	7.15378
				48.374	12.1945
				21.5674	11.0481
				38.3828	17.836
				11.6149	5.31878
				9.20209	5.82981
				34.7034	8.67951
				27.7832	8.78321
				34.45	12.4686
				34.5802	6.8642
				21.4619	8.11804
				27.701	4.59988
				29.3966	12.2963
				25.2894	11.7402
				11.3011	4.08068
				23.1654	10.1341
				6.38983	3.20746
				21.9575	10.7437
				24.6146	11.5822
				27.4483	11.2217
				8.39652	4.65368
				12.1696	5.86455
				24.9613	11.1657
								*= data represents mean FRETT value from cells post PDGF treatment
