# Supplementary material for: A Fyn biosensor reveals pulsatile, spatially localized kinase activity and signaling crosstalk in live mammalian cells
Source: eLife. 2020 Feb 4;9:e50571. doi: 10.7554/eLife.50571 (PMC7000222; doi:10.7554/eLife.50571)
Supplement: Figure 5—source data 2. [file elife-50571-fig5-data2.xlsx]

## Sheet: Figure 5-source data 2
		Figure 5 -source data 2				Quantification of FynSensor non-binding control FRET levels in low and high activity zones in U2OS cells
								B (II)
								Max-FRETT intensity (a.u)[y-axis]*
							sensor type[x-axis]->	FynSensor	non-binder
								16.7828	19.2819
								8.52961	14.2146
								30.5864	2.52657
								24.9966	11.0329
								14.8167	4.67135
								40.5927
								41.9613
								28.4533
								27.6977
								26.7964
								21.7015
								31.7685
								28.8274
								35.0884
								38.8415
								44.5431
								19.7952
								25.4178
								18.6105
								13.1539
								21.6328
								21.4064
								32.3053
								25.3041
								22.9057
								25.2846
								32.0977
								23.777
								11.1841
								30.0052
								16.4946
								24.5746
								28.4688
								45.7041
								43.1252
								14.1374
								20.1181
								*= data represents mean FRETT value from cells post PDGF treatment
