# Supplementary material for: A Fyn biosensor reveals pulsatile, spatially localized kinase activity and signaling crosstalk in live mammalian cells
Source: eLife. 2020 Feb 4;9:e50571. doi: 10.7554/eLife.50571 (PMC7000222; doi:10.7554/eLife.50571)
Supplement: Figure 5—source data 3. [file elife-50571-fig5-data3.xlsx]

## Sheet: Figure 5-source data 3
			Figure 5-source data 3					Quantification of FynSensor FRET levels in cells in treated with FAK inhibitor
		C(II)
			FAKi treatment (n=5 cells)									C(III)									C (IV)
		Time(minutes)[x-axis]*	cell-1	cell-2	cell-3	cell-4	cell-5	Average	s.e.m				FAKi treatment(n=5 cells)									FRETT intensity (a.u)[y-axis]
		-5	26.8135	20.8984	17.9176	19.4862	34.0919	23.8415	2.97185			Time(minutes)	FRETT intensity (a.u)[y-axis]								Time(minutes)	cell-1	cell-2	cell-3	cell-4	cell-5	cell-6	cell-7	cell-8	Average
		-4	29.8987	19.5953	17.055	17.5809	40.2425	24.8745	4.49252				cell-1	cell-2	cell-3	cell-4	cell-5	Average	s.e.m		-5	13.5151	20.9256	15.99	16.6946	13.4326	15.3334	13.7185	13.8167	15.4283
		-3	37.1013	19.0682	15.8724	18.8085	38.5838	25.8868	4.91881			t=0	38.8513	19.9631	15.9597	16.4391	34.3476	25.1121	4.79369		-4	13.9317	20.8617	17.036	15.5502	13.2367	14.4552	14.8504	14.27	15.524
		-2	35.9313	19.241	17.4526	16.8304	38.9475	25.6806	4.84051			t=5	13.9057	15.2201	15.7923	9.49118	18.6774	14.6173	1.50025		-3	13.3456	20.9961	16.5434	16.4718	13.3786	15.6765	14.6107	14.2851	15.6635	Time averaged FRETT intensity(a.u)[y-axis]
		-1	38.8513	19.9631	15.9597	16.4391	34.3476	25.1121	4.79369			t=15	11.2975	12.6941	10.1071	8.7203	16.4073	11.8453	1.3157		-2	12.4113	19.9761	16.0327	15.6555	12.2509	15.2122	14.2388	14.4765	15.0317	before (-DMSO)	after (+DMSO)
		1	17.7265	19.8778	16.5048	16.0255	34.1106	20.849	3.38168												-1	13.4149	20.5029	15.5889	16.1237	12.8438	15.4812	14.6108	13.4812	15.2559	15.4283	15.2516
		2	15.4428	16.1533	17.2447	10.1255	22.1837	16.23	1.92836												1	13.105	21.234	14.2403	15.5602	13.1288	15.7745	14.6049	14.3651	15.2516	15.524	16.2314
		3	14.6285	14.9364	15.2096	9.60404	19.9426	14.8642	1.63773												2	14.7299	12.8484	22.6519	18.2264	19.6594	15.0191	11.7805	14.9353	16.2314	15.6635	16.5935
		4	15.1372	14.3491	15.3357	9.38159	19.2003	14.6808	1.56936												3	13.8811	14.0123	22.1074	18.8378	20.7653	16.1379	12.1678	14.8382	16.5935	15.0317	16.5143
		5	13.9057	15.2201	15.7923	9.49118	18.6774	14.6173	1.50025												4	15.0002	13.2299	20.6437	19.1047	20.1518	15.556	11.8852	16.543	16.5143	15.2559	16.2846
		6	13.051	14.3862	13.4779	9.45835	19.5221	13.9791	1.61931												5	14.2904	13.2899	20.3561	18.8284	20.8152	15.3016	11.6787	15.7164	16.2846	Avg= 15.3806	17.1452
		7	12.7028	14.5735	14.3927	9.33418	20.0252	14.2057	1.7325												6	14.7702	15.9317	21.8956	19.0729	21.4347	15.6535	12.039	16.3645	17.1452	s.e.m= 0.095	16.6284
		8	12.217	15.0955	11.915	9.54952	18.1295	13.3813	1.47774												7	14.8772	14.4173	22.0945	18.6667	19.543	15.3438	11.7956	16.2889	16.6284		16.7921
		9	12.5905	15.8595	11.3415	9.29034	17.2687	13.2701	1.46145												8	17.4183	12.4277	22.1654	17.9946	20.2148	15.6253	12.1226	16.3684	16.7921		16.3259
		10	12.0693	14.6592	9.95089	8.6892	17.8755	12.6488	1.65312												9	15.9247	11.9575	23.094	18.1455	17.9782	15.3829	12.2105	15.9139	16.3259		16.6027
		11	11.6157	14.0608	11.4768	9.77637	17.5041	12.8868	1.34123												10	14.5982	12.1656	22.0996	18.8352	20.1038	15.3579	12.2857	17.3756	16.6027		16.91
		12	11.6799	13.2613	9.83604	7.96766	16.7657	11.9021	1.50503												11	17.4976	11.818	21.7455	18.5671	20.2594	15.5553	12.3768	17.4602	16.91		16.6449
		13	11.5379	13.6326	8.95598	8.73833	16.825	11.938	1.51736												12	17.0848	11.8029	21.9612	18.8508	19.7986	15.3741	11.0531	17.2336	16.6449		16.3433
		14	11.686	13.1151	10.4655	8.64923	16.1783	12.0188	1.27245												13	15.5192	12.0361	21.0396	18.3628	19.7837	15.2909	11.9502	16.7642	16.3433		16.2596
		15	11.2975	12.6941	10.1071	8.7203	16.4073	11.8453	1.3157												14	15.7899	11.5788	20.6428	18.2489	19.4277	14.4629	12.9518	16.9736	16.2596		16.24
		16	11.0317	13.4872	9.70943	8.65827	15.6653	11.7104	1.27633												15	16.2174	11.5188	20.9107	17.6403	19.1448	15.3159	12.3331	16.8393	16.24		16.0108
		17	11.0317	12.8022	9.62358	8.1997	15.1503	11.3615	1.2157												16	15.7786	11.0172	20.9986	17.6284	18.8304	15.1135	12.6243	16.0954	16.0108		16.2281
																					17	15.9642	11.7904	21.0329	18.0176	18.9584	14.7882	12.4767	16.7961	16.2281		Avg=16.41214
			* negative time points indicate time prior to treatment																													S.e.m=0.1008
