# Supplementary material for: A Fyn biosensor reveals pulsatile, spatially localized kinase activity and signaling crosstalk in live mammalian cells
Source: eLife. 2020 Feb 4;9:e50571. doi: 10.7554/eLife.50571 (PMC7000222; doi:10.7554/eLife.50571)
Supplement: Figure 6—figure supplement 1—source data 1. [file elife-50571-fig6-figsupp1-data1.xlsx]

## Sheet: Figure 6-figure supplement-1
			Figure 6-figure supplement 1-source data 1						Quantifying the expression of Fyn kinase (labeled or unlabeled)in Fyn KD-HEK293T cells relative to control cells
									B
									Fold Intensity (from Immunoblot analysis)
									HEK Sh Control	HEK Fyn Sh-vector	HEK Fyn Sh-Unlabeled Fyn	HEK Fyn Sh-FynSensor
									1	0.663292	1.75342	2.00369
									1	0.555927	0.918106	1.11354
									1	0.617715	1.42825	1.76153
									1	0.764988	1.32734	1.87794
