# Supplementary material for: A Fyn biosensor reveals pulsatile, spatially localized kinase activity and signaling crosstalk in live mammalian cells
Source: eLife. 2020 Feb 4;9:e50571. doi: 10.7554/eLife.50571 (PMC7000222; doi:10.7554/eLife.50571)
Supplement: Figure 6—figure supplement 2—source data 1. [file elife-50571-fig6-figsupp2-data1.xlsx]

## Sheet: Figure 6-figure supplement-2
		Figure 6-figure supplement-2-source data 1						Quantification of donor:acceptor ratios in different cell types used for FynSensor imaging experiments
											A
											Donor/Acceptor Ratio[y-axis]
										cell type[x-axis]->	U2OS cells	HEK-KD cells	C2C12 cells
											0.232049	0.556573	0.304192
											0.727588	0.913062	0.399718
											0.577012	0.816759	0.601036
											0.70285	0.480507	0.202575
											0.791186	0.683332	0.689278
											0.338943	0.45648	0.655416
											0.565557	0.51613	0.573592
											0.783226	0.666547	0.639898
											0.59186	0.651099	0.483855
											0.656518	0.358719	0.679831
											0.599002	0.359243	0.28451
											0.463096	0.215775	0.53525
											0.398674	0.237956	0.246808
											0.5553	0.528924	0.427242
											0.699919	0.474418	0.589732
											0.744916	0.577461	0.415978
											0.682651	0.391872	0.351062
											0.622425	0.576113	0.963896
											0.651096	0.708618	0.514926
											0.52752	0.682289	0.768169
											0.4002	0.632261	0.783936
											0.552756	0.265508	0.70726
											0.542099	0.777383	0.245964
											0.416283	0.618308	0.664728
											0.614946		0.599096
											0.561848		0.29815
											0.646299		0.248092
											0.629015		0.234155
											0.624694		0.160778
											0.432805		0.175842
													0.779767
													0.471263
										AVG	0.577744	0.5477	0.481499
										S.e.m.	0.0242	0.037	0.0376
