# Supplementary material for: A Fyn biosensor reveals pulsatile, spatially localized kinase activity and signaling crosstalk in live mammalian cells
Source: eLife. 2020 Feb 4;9:e50571. doi: 10.7554/eLife.50571 (PMC7000222; doi:10.7554/eLife.50571)
Supplement: Figure 6—figure supplement 2—source data 2. [file elife-50571-fig6-figsupp2-data2.xlsx]

## Sheet: Figure 6-figure supplement 2
			Figure 6-figure supplement-2-source data 2						Analysis of spatio-temporal fyn activity patterns in U2OS cells expressing different levels of Fyn kinase
											B
												FRETT intensity(a.u)[y-axis]
											Time(minutes)[x-axis]	cell-1(top)	cell-2(bottom)
											0	30.2911	24.4823
											1	30.7568	27.0677
											2	32.385	26.6323
											3	30.9565	26.3902
											4	31.0676	28.4752
											5	30.4271	26.1224
											6	27.6446	21.0961
											7	26.3404	21.568
											8	24.471	21.8121
											9	24.6373	22.0076
											10	25.4084	21.3451
											11	25.8453	21.1452
											12	26.7634	23.0227
											13	26.0309	22.8314
											14	24.9925	22.3626
											15	28.7363	22.2777
											16	24.5352	22.8132
											17	29.1859	23.3218
											18	29.6618	21.9179
											19	30.5864	23.8323
											20	26.6724	22.2312
											21	23.682	22.452
											22	25.3178	24.4948
											23	26.5965	21.4569
											24	26.6803	22.5795
											* for donor channel intensity of U2OS cells please refer to Figure 6c data
