# Supplementary material for: A Fyn biosensor reveals pulsatile, spatially localized kinase activity and signaling crosstalk in live mammalian cells
Source: eLife. 2020 Feb 4;9:e50571. doi: 10.7554/eLife.50571 (PMC7000222; doi:10.7554/eLife.50571)
Supplement: Figure 6—source data 1. [file elife-50571-fig6-data1.xlsx]

## Sheet: Figure 6-source data 1
						Figure 6-source data 1		Quantification of Fynsensor FRET levels in low and high activity zones in C2C12 cells
						A (II)
						FRETT intensity (a.u)[y-axis]
					cell zone[x-axis]->	High FRETT zone(Max-FRETT-HFQ)	Low FRETT zone(Max-FRETT-LFQ)
						18.5303	10.2329
						21.8894	7.0098
						26.7049	8.11402
						19.348	6.54668
						31.6584	11.3651
						36.958	19.9064
						13.4378	4.24434
						33.0992	9.05531
						56.3111	23.3647
						27.4035	11.968
						19.7018	3.21709
						53.1249	22.7919
						28.2523	8.32289
						23.7617	6.3782
						23.6633	6.1026
						20.0282	5.38871
						42.9522	11.3191
						23.8513	11.9799
						41.5893	9.33531
						40.9016	11.0955
						37.6828	11.5301
						30.2668	7.58128
						10.3793	2.77122
						23.9833	13.7522
						15.8396	5.60253
						14.9806	5.74234
						15.9753	1.90695
						16.4666	2.11308
						16.1929	7.02803
						21.3203	2.95451
						42.1266	12.1269
						27.3252	10.7596
