# Supplementary material for: A Fyn biosensor reveals pulsatile, spatially localized kinase activity and signaling crosstalk in live mammalian cells
Source: eLife. 2020 Feb 4;9:e50571. doi: 10.7554/eLife.50571 (PMC7000222; doi:10.7554/eLife.50571)
Supplement: Figure 6—source data 2. [file elife-50571-fig6-data2.xlsx]

## Sheet: Figure 6-source data 2
						Figure 6-source data 2		Quantification of Fynsensor FRET levels in low and high activity zones in Fyn-KD HEK293T cells
																B (II)
																FRETT intensity (a.u)[y-axis]
															cell zone[x-axis]->	High FRETT zone(Max-FRETT-HFQ)	Low FRETT zone(Max-FRETT-LFQ)
																14.8796	6.55934
																40.1471	9.96516
																21.0839	8.43409
																17.6906	4.29125
																1.64757	0.634355
																15.4319	6.39383
																18.9769	8.86703
																33.6494	14.4724
																30.1292	15.0999
																24.6917	9.96455
																13.0551	6.19404
																5.61219	1.97166
																7.0641	2.92754
																19.9138	5.04024
																23.1546	9.33201
																29.5848	3.64546
