# Supplementary material for: A Fyn biosensor reveals pulsatile, spatially localized kinase activity and signaling crosstalk in live mammalian cells
Source: eLife. 2020 Feb 4;9:e50571. doi: 10.7554/eLife.50571 (PMC7000222; doi:10.7554/eLife.50571)
Supplement: Figure 6—source data 3. [file elife-50571-fig6-data3.xlsx]

## Sheet: Figure 6-source data 3
					Figure 6-source data 3				Quantification of expression of FynSesnor-Fyn (m-Cer-Fyn) in different cell-types showing similar activity patterns
											C
												Donor Channel Fluorescence Intensity(a.u)[y-axis]
											cell type[x-axis]->	C2C12 cells	HEK-KD cells	U2OS cells
												61.4083	57.1529	47.268
												80.1516	66.5031	65.8408
												68.943	64.5189	69.7292
												51.3273	53.7031	58.2026
												56.5808	68.2942	48.2443
												50.9639	44.8351	76.072
												60.9431	54.7961	65.1143
												52.6623	51.196	46.3261
												51.9409	51.9758	36.5555
												55.9051	63.0374	69.5567
												54.8497	49.1419	61.5673
												45.5844	23.7694	63.3593
												52.0067	20.4538	53.9874
												34.2845	44.5677	42.6023
												47.5818	67.7423	45.0677
												42.9629	49.2015	38.6827
												79.6327	62.9473	52.2426
												62.0932	37.9355	64.2163
												52.962	52.6354	54.1832
												67.4044	61.8131	49.2988
												65.3806	59.4427	51.4753
												50.4882	43.632	60.6236
												42.3952	59.1361	50.8263
												42.3332	53.1412	57.3606
												26.5589	Avg=52.57	29.2066
												37.0859	s.e.m=2.532	51.2112
												46.5679		57.9007
												50.2262		34.947
												39.1852		41.1602
												44.1411		45.9507
												63.9267		41.3896
												58.1845		62.9841
												Avg= 53.0206		41.9075
												s.e.m.=2.13		45.4304
														40.689
														44.5421
														43.6859
														Avg= 51.605
														s.e.m.= 1.805
