# Supplementary material for: A Fyn biosensor reveals pulsatile, spatially localized kinase activity and signaling crosstalk in live mammalian cells
Source: eLife. 2020 Feb 4;9:e50571. doi: 10.7554/eLife.50571 (PMC7000222; doi:10.7554/eLife.50571)
Supplement: Figure 7—figure supplement 1—source data 1. [file elife-50571-fig7-figsupp1-data1.xlsx]

## Sheet: Figure 7-figure supplement-1
				Figure 7-figure supplement-1-source data 1						quantification of FRETT signal over time in multiple U2OS cells
												FRETT intensity(a.u)[y-axis]
											Time(minutes)[x-axis]	cell-1	cell-2	cell-3	cell-4	cell-5	cell-6
											0	32.4593	53.0978	23.3351	22.4582	28.3226	33.576
											0.5	31.5126	49.4256	23.6163	24.2622	32.1349	37.6274
											1	26.1528	64.1936	23.4395	26.694	27.0353	35.4659
											1.5	26.8978	63.401	26.055	28.319	27.9243	30.1713
											2	27.4275	57.7225	24.3313	26.7574	28.7252	36.7587
											2.5	24.2356	77.2785	25.5659	27.2448	25.2164	33.0426
											3	18.9396	71.4192	24.9022	28.282	25.0095	34.3695
											3.5	22.2593	78.0034	27.5026	28.6286	22.602	29.0732
											4	24.5383	62.485	25.6439	26.5167	26.2711	32.4493
											4.5	21.4658	77.8311	25.5862	26.7265	26.2045	30.5289
											5	19.0523	78.1089	22.5086	27.4519	25.7583	33.9917
											5.5	17.7113	71.5518	24.3241	25.4863	27.2718	34.4641
											6	22.0487	44.5555	24.0977	27.5643	26.7855	30.2376
											6.5	23.2639	49.1472	24.7507	27.9985	24.3644	33.2843
											7	18.4446	53.9832	27.4578	26.3601	26.6547	32.6466
											7.5	22.1995	43.8232	28.8687	27.5511	26.2325	30.5633
											8	22.7604	42.2553	27.9883	25.6634	28.3154	27.492
											8.5	23.7276	39.5453	24.0545	25.9115	26.0509	28.7338
											9	28.4972	39.6068	22.2622	26.4582	26.1616	29.0791
											9.5	26.6942	44.1359	26.9195	25.9828	24.9502	27.8383
