# Supplementary material for: A Fyn biosensor reveals pulsatile, spatially localized kinase activity and signaling crosstalk in live mammalian cells
Source: eLife. 2020 Feb 4;9:e50571. doi: 10.7554/eLife.50571 (PMC7000222; doi:10.7554/eLife.50571)
Supplement: Figure 7—figure supplement 2—source data 1. [file elife-50571-fig7-figsupp2-data1.xlsx]

## Sheet: Figure 7-figure supplement 2
				Figure 7-figure supplement-2-source data 1						Quantification of FRETT signal over time in multiple C2C12 cells
											FRETT intensity(a.u)[y-axis]
										Time(minutes)[x-axis]	cell-1	cell-2	cell-3	cell-4	cell-5	cell-6
										0	46.7776	29.9315	29.6762	26.9557	33.1629	24.5733
										1	54.2917	25.3665	36.0065	26.0883	42.1266	23.6278
										2	44.9005	28.2073	40.9016	37.6828	33.6507	16.8625
										3	41.7562	32.1711	31.6189	32.4759	27.0272	21.0768
										4	35.3607	20.7908	24.5851	32.3529	18.9175	26.3414
										5	39.4363	17.5291	20.6014	35.4471	30.5358	27.3252
										6	43.9894	33.0992	24.8211	31.5799	34.9291	18.7774
										7	55.9052	22.2723	26.4957	21.3082	41.7952	18.9111
										8	51.6215	27.2122	25.7594	20.4367	41.3152	19.7091
										9	56.3111	21.9492	16.8471	35.5538	42.0627	20.3073
										10	40.8845	10.0728	28.0938	18.2097	38.6561	18.8755
										11	43.8395	10.2076	27.0744	18.5424	39.6808	19.4166
										12	45.6983	9.1434	25.6133	18.3735	36.8126	14.9126
										13	45.502	9.6269	23.8276	17.9486	36.8597	18.3492
										14	40.2736	10.3319	23.6793	17.653	42.8698	19.8016
