# Supplementary material for: A Fyn biosensor reveals pulsatile, spatially localized kinase activity and signaling crosstalk in live mammalian cells
Source: eLife. 2020 Feb 4;9:e50571. doi: 10.7554/eLife.50571 (PMC7000222; doi:10.7554/eLife.50571)
Supplement: Figure 7—figure supplement 3—source data 1. [file elife-50571-fig7-figsupp3-data1.xlsx]

## Sheet: Figure 7-figure supplement-3
					Figure 7-figure supplement-3-source data 1						Quantification of FRETT signal over time in multiple Fyn-KD HEK 293T cells
										FRETT intensity(a.u)[y-axis]					FRETT intensity(a.u)[y-axis]
									Time(minutes)[x-axis]	cell-1	cell-2	cell-3		Time(minutes)[x-axis]	cell-4	cell-5	cell-6
									0	36.6045	25.8561	24.6917		0	27.8821	30.0005	31.6124
									1	38.4491	27.5063	23.0361		0.5	27.5482	29.0809	29.8862
									2	40.1471	28.2736	20.8371		1	29.0275	29.4799	28.3796
									3	39.7709	28.283	21.6383		1.5	28.9486	32.54	32.0963
									4	40.049	30.1292	22.3365		2	28.2178	30.3569	32.0648
									5	28.3892	23.9157	22.4188		2.5	27.4702	30.8681	31.6336
									6	28.329	23.4553	21.6205		3	26.3281	35.2429	32.1247
									7	29.5501	23.2565	19.584		3.5	25.1828	35.8626	31.6219
									8	28.3978	23.3606	20.9136		4	26.138	35.3422	31.2641
									9	29.6943	25.8116	22.2399		4.5	25.0687	34.9469	31.4126
									10	30.8197	26.0069	23.6143		5	26.618	35.3179	31.2029
									11	28.9558	26.2353	23.6163		5.5	25.0909	35.31	31.7054
									12	29.9134	26.684	22.4773		6	25.84	34.9682	30.2254
									13	31.1755	26.39	20.9655		6.5	27.0066	32.7076	34.3138
									14	30.5134	26.4106	18.954		7	25.7579	36.428	33.4346
									15	31.336	25.7364	20.8218
									16	32.1469	27.2048	20.9139
									17	32.8833	28.1808	22.0303
									18	32.0232	28.3305	21.3855
									19	32.1549	28.261	21.4121
