# Supplementary material for: A Fyn biosensor reveals pulsatile, spatially localized kinase activity and signaling crosstalk in live mammalian cells
Source: eLife. 2020 Feb 4;9:e50571. doi: 10.7554/eLife.50571 (PMC7000222; doi:10.7554/eLife.50571)
Supplement: Figure 7—source data 1. [file elife-50571-fig7-data1.xlsx]

## Sheet: Figure 7-source data 1
				Figure 7-source data 1					Analysis of temporal patterns of Fyn activity in U2OS cell
				A (II) U2OS
				Time(minutes)[x-axis]	FRETT intensity(a.u)[y-axis]
				0	15.9159
				1	16.9708
				2	17.0136
				3	15.6799
				4	16.1528
				5	16.4522
				6	16.4426
				7	15.2666
				8	16.1556
				9	16.6477
				10	16.7829
				11	16.6601
				12	14.8419
				13	14.7656
				14	14.0564
				15	13.7671
				16	15.0652
				17	15.2607
				18	15.9478
				19	16.2684
				20	16.5373
				21	15.2986
				22	14.5274
				23	13.5479
				24	15.6479
