# Supplementary material for: A Fyn biosensor reveals pulsatile, spatially localized kinase activity and signaling crosstalk in live mammalian cells
Source: eLife. 2020 Feb 4;9:e50571. doi: 10.7554/eLife.50571 (PMC7000222; doi:10.7554/eLife.50571)
Supplement: Figure 7—source data 2. [file elife-50571-fig7-data2.xlsx]

## Sheet: Figure 7-source data 2
				Figure 7-source data 2					Analysis of temporal patterns of Fyn activity in C2C12 cell
								B (II) C2C12
								Time(minutes)[x-axis]	FRETT intensity(a.u)[y-axis]
								0	22.3342
								1	22.9465
								2	18.6658
								3	24.4514
								4	25.8772
								5	26.7049
								6	21.9963
								7	23.7764
								8	23.635
								9	22.5385
								10	23.4011
								11	24.9647
								12	24.2375
								13	26.085
								14	24.823
								15	24.7279
								16	24.8543
								17	23.3401
								18	24.5585
								19	21.6746
								20	23.3747
								21	21.7541
								22	22.3056
								23	21.3885
								24	20.4567
