# Supplementary material for: A Fyn biosensor reveals pulsatile, spatially localized kinase activity and signaling crosstalk in live mammalian cells
Source: eLife. 2020 Feb 4;9:e50571. doi: 10.7554/eLife.50571 (PMC7000222; doi:10.7554/eLife.50571)
Supplement: Figure 7—source data 3. [file elife-50571-fig7-data3.xlsx]

## Sheet: Figure 7-source data 3
				Figure 7-source data 3					Analysis of temporal patterns of Fyn activity in Fyn-KD HEK 293T cell
												C (II) HEK-Fyn KD
												Time(minutes)[x-axis]	FRETT intensity(a.u)[y-axis]
												0	14.8167
												1	16.0408
												2	16.6085
												3	16.5294
												4	17.6906
												5	34.4489
												6	30.3778
												7	27.6356
												8	30.1601
												9	27.8466
												10	27.3431
												11	27.5058
												12	31.7625
												13	28.9335
												14	27.7597
												15	27.861
												16	30.1805
												17	31.6596
												18	31.1437
												19	31.8227
