# Supplementary material for: A Fyn biosensor reveals pulsatile, spatially localized kinase activity and signaling crosstalk in live mammalian cells
Source: eLife. 2020 Feb 4;9:e50571. doi: 10.7554/eLife.50571 (PMC7000222; doi:10.7554/eLife.50571)
Supplement: Figure 7—source data 4. [file elife-50571-fig7-data4.xlsx]

## Sheet: fgiure 7-source data 4
					Figure 7-source data 4					Quantification of Fyn activity pulse time-period across different cell-types
											D
												Pulse time-period(minutes)[y-axis]
											cell-type[x-axis]->	U2OS	C2C12	HEK-KD
												3.71014	6.5641	3.01177
												3.55556	2.63917	2.01575
												6.73684	4.19672	2.81319
												3.01177	3.8209	2.94253
												2.7234	2.01575	3.01177
												2.90909	5.22449	2.94253
												2.69474	6.5641	2.69474
												3.01177	2.90909	2.01575
												2.01575	5.12	2.94253
												2.01575	3.08434	5.81818
												2.01575	4	2.56
												2.81319	6.4	5.44681
												2.01575	3.2	5.01961
												3.2	6.2439	5.22449
												2.87641	3.41333	2.16949
												2.81319	3.36842	3.71014
												3.50685	3.24051
												2.01575	2.56	Avg=3.3962
												8.82759	4.41379	s.e.m=0.3156
												4.74074	5.22449
												12.1905	3.50685
												2.18803	2.78261
												5.12	5.22449
												3.36842	2.01575
												4.06349	2.01575
												2.56	5.68889
												2.01575	5.01961
												2.01575	2.30631
												2.01575	2.32727
												3.50685	3.71014
												3.45946	2.01575
												3.36842	2.90909
												2.48544
												2.90909	Avg=3.8664
												2.90909	s.e.m=0.2571
												2.01575
												3.45946
												Avg=3.4286
												s.e.m=0.331
