# Supplementary material for: A Fyn biosensor reveals pulsatile, spatially localized kinase activity and signaling crosstalk in live mammalian cells
Source: eLife. 2020 Feb 4;9:e50571. doi: 10.7554/eLife.50571 (PMC7000222; doi:10.7554/eLife.50571)
Supplement: Figure 7—source data 5. [file elife-50571-fig7-data5.xlsx]

## Sheet: figure 7-source data 5
																												Figure 7-source data 5						Quantification of Fyn activity relative to distance from cell membrane in C2C12 cell
E(II)
Distance from cell periphery(a.u)[x-axis]
		1	2	3	4	5	6	7	8	9	10	11	12	13	14	15	16	17	18	19	20	21	22	23	24	25	26	27	28	29	30	31	32	33	34	35	36	37	38	39	40	41	42	43	44	45	46	47	48
Time(minutes)[y-axis]	1	43.7561	40	42.1463	41.878	39.9756	40.6829	39.1463	37.122	30.3415	28.2195	28.1463	26.9756	24.122	25.9512	29.1707	23.6829	23.6341	28.5366	25.6829	21.6585	22.2195	21.0488	17.4878	17.9024	16.3659	19.2195	17.9756	13.8293	14.9756	17.3415	16.8293	15.5854	14.122	16.2683	16.8049	15.7073	13.6341	14.6829	13.4878	9.65854	9.87805	12.439	12.5122	13.8537	14.0244	10.8293	8.41463	9.04878
	2	40.0732	43.0488	43.7805	44.4634	43.9268	38.5122	38.2439	41.4634	41.0244	37.8537	29.0976	23.2195	23.2439	26.2927	24.561	25.1463	22.561	24.8537	26.1707	22.0976	20.6341	17.2683	17.0488	19.2195	21.4634	20.6829	22.6341	16.3415	16.2927	17.9268	17.6341	16.8537	16.5366	16.3902	21.9268	19.6341	18.9512	16.4146	17.0732	16.9512	11.8049	10.3171	7.95122	10.1463	12.9024	11.2683	10.0732	10.6341
	3	32.9756	34.9512	32.3902	33	30.1951	30.1951	26.0976	24.2439	26.1463	25.6341	28.6585	27.2195	22.4878	20.3415	22.8049	25.6341	25.1463	23.1707	20.9512	18.2195	21.9024	20.2439	17.7561	17.561	17.2195	14.6098	11.6585	10.5122	12.6341	15.3415	13.122	12.2927	16.1707	16.6098	17.3415	11.9756	11.2683	12.4146	11.3415	11.0976	11.4146	13	11.2683	11.9024	13.439	12.7805	12.5366	12.561
	4	51.2439	50.9268	44.6829	44.7317	42.878	40.2195	39.6829	43.9024	36.3171	37.3659	40.5854	37.9512	34.0488	34.2927	31.7805	29.9756	31.2927	30.5366	28.3659	28.7805	28	22.7317	23.4146	22.0732	23.9756	22.9268	19.4878	16.0244	14.439	14.7805	22	21.0732	15.3902	16.3415	19.1463	22.2683	18.7561	17.6098	16.8049	12.9268	11.1951	12.3415	12.2195	10.8293	10.5122	9.80488	10.0244	10.6585
	5	44.2439	48.5366	42.3415	42.7073	46.9756	48.9512	39.4878	35.7805	39.9268	37.561	40.3171	34.7073	30.9268	29.878	29.9024	32.5122	32.878	31.0488	32.4878	29.122	27.6829	28.9512	24.1951	21.5366	16.9024	17.6585	17.0732	17.7805	19.3415	19.5122	16.561	14.8049	16.9756	17	15.3171	13	12.122	13.439	14.6341	14.5854	14.1463	13.8537	12.439	12.4878	10.0244	10	10.8049	11.4878
	6	64.9756	59.6585	57.4146	54.6341	56.0244	53.4146	56.7805	56.0244	45.5854	41.1951	41.7561	44.5366	44.0732	43.439	38.3415	36.7073	36.0732	34.6341	30.3415	30.5366	29.7561	25.0488	27.4878	26.1951	23.3902	24.8537	24.4146	20.878	20.1707	23.7073	23.3171	21.1463	20.0488	18.5854	15.4878	17.3902	17.0244	13.6341	14.878	15.2439	13.561	14.3659	15.5366	15.3415	15.122	10.8049	10.4878	12.9512
	7	46.8293	45.0732	43.7317	40.2439	38.3171	36.4878	38.439	39.878	36.5366	35.3902	34.7561	32.6098	34.6341	31.3171	30.3659	34.1707	33.0488	26.1707	23.6341	23.6829	22.7317	21.1707	21.7317	23.6829	18.2683	17.4146	17.4146	17.7805	17.1463	17.3659	17.5366	18.122	21.2683	19.4634	15.5854	16.3415	18.6098	15.3415	14.6341	15	13.0732	13.3902	11.7317	9.2439	11.4146	10.9512	11.2927	12.439
	8	38.9756	31.7561	31.0488	33.9268	33.0732	29.3415	24.3902	25.8293	29.122	30.0244	27.7073	23.9024	22.4146	22.2439	24.9756	27.4878	27.3659	23.1463	18.5854	18.0976	18.4146	18.1707	16.8537	16.3902	13.7561	16.9024	15.2195	13.5366	16.2683	17.3659	18.5122	16.1707	16.9024	13.5854	13.0732	11.7317	9.65854	10.561	15.122	13.9024	14.6829	11.7073	11.439	10.2195	7.7561	8.04878	9.07317	8.68293
	9	59.6098	56.9268	55.6341	56.6341	48.7317	44.9756	40.4634	41.4878	40.5854	39.1951	40.439	35.561	30.9024	29.9512	29.0488	28.3171	28.6098	25.2683	29.3171	30.6341	26.1463	24.1707	21.4146	23.4878	22.439	18.4634	18.8049	19.8049	20.0976	19.2439	18.9268	20.1707	20	16.3415	14.878	18.5122	19.1707	16.4146	14.0244	13.3415	12.8049	10.9756	13.2683	13.2683	13.3171	13.5854	12.2195	10.6585
	10	54.878	54.4878	48.8537	48.9024	45.4634	40.122	41.1951	36.1707	39.1707	41.1463	38.8293	34.6098	31.5366	24.9512	25.8537	26.7561	30.4146	30.3659	25.8293	25.0976	20.3171	17.3171	17.9268	18.0732	20.6341	21.122	19.1707	18.2195	16.3415	15.9024	16.7073	16.6341	18.7317	16.7561	15.6341	16.8049	17.9756	19.122	17.0732	18.3659	17.1707	15.7317	14.7805	13.7561	12.6585	10.7317	8.92683	9.92683
	11	34.7561	30.7805	31.2439	35.2683	37.3659	39.561	37.3659	37.439	35	32.439	32.7073	29.3659	33.2195	36.0732	36.1951	34.7317	33.1707	35	35.5854	37.3902	38	36.6098	38.4146	37.3415	30.6098	30.3902	29.1463	25.3171	23.4634	22.1951	21.878	20.6585	20.2195	18.5122	15.561	16.9512	16.6829	15.9512	14.3171	11.8293	14.4634	14.1707	15.2195	16.5854	18.7805	17.9268	14.4146	14.3171
	12	41.3902	43.8537	45.5366	46.8293	47.439	51.3415	52.439	50.0976	46.1707	45.878	45.1951	39.2927	35.6341	29.7317	35.0732	40.9512	39.3902	39	41.1463	44.9268	45.7317	44.4878	41.122	33.9756	32.3659	30.1463	28.2195	27.9268	24.9512	20.9756	22.8293	25.561	20.5122	16	13.561	17.7073	15.7317	11.878	16.4146	18	19.6829	18.561	14.8049	13.561	13.2683	14.122	12.5854	13.2195
	13	43.6585	44.0732	48.7805	48.4634	45.2195	44.0244	45.3902	46.0244	45.2439	43.9268	39.9512	37.2195	38.0244	33.0732	30.6341	30.4634	33.7561	36.878	35.0976	34.0976	32.0488	28.7561	25.2683	22.7317	24.2927	24.3415	20.9756	20.0488	21.3659	19.9268	17	17.9024	18.0732	18.8293	19.5366	15.9268	14.9024	15.4878	16.4634	18.3415	20.9756	19.878	15.9024	14.6098	15.5854	12.2683	10.9756	14.3415
	14	47.2927	44.7317	32.3659	29.9268	27.6829	26.3415	30.5854	31.2683	29.7073	27.1951	28.7805	28.9024	23.122	23.7805	23.122	25.3659	24.8049	27.2195	30.7317	28.3415	23.2195	22.6098	24.7073	25.0976	22.9024	24.8049	25.2927	27.6098	26.4634	22.4634	21.3415	20.5366	21.3902	23.1707	23.9512	21.6098	17.8293	15.6341	17.3659	18.4878	17.5366	18.4146	20.2683	19.4146	17.439	16.3659	15.7561	15.7561
	15	52.9756	58.2195	56.561	54.1951	55.7561	57.4634	54.9024	54.4634	54.2439	52.7561	49.7317	49.9756	51.9512	53.9512	52.7805	50.7073	50.878	47.2195	47.9268	46.9024	42.0244	38.9024	36.9512	38.6341	35.9024	32.6098	32.3171	29.0244	25.7317	23.5854	21.0732	19	16.0976	16.8293	20.9268	18.0976	16.5854	18.0976	19.0244	17.3902	14.4878	13.8293	17.5366	16.4878	14.0976	14.1707	13.5854	13.6098
	16	53.4634	51.2195	52.3659	49.3171	48.2683	52.7561	49.9756	51.561	51.7317	50.5366	49.2927	48.7805	39.6585	38.4878	44.122	48.6098	44.6829	41.3659	41.2927	40.0732	32.6098	29.5854	32.5854	31.7317	27.3415	23.7073	22.6098	20.7073	21.8537	22.3171	18.9756	22.9756	24.561	22.4634	22.1707	18.7805	16.2927	17.6585	18.4878	18.3902	19.3902	17.6585	16.2195	14.6585	12.2927	10.3171	11.3415	13.6585
	17	47.6098	49.6829	50.7561	51.6341	56.9756	62.3902	57.6098	55.4146	47.5366	45.3902	45.2683	41.3415	41	42.122	39.878	38.1951	41.1463	41.1463	38.1463	36.8293	37.5854	35.5366	31.3171	28.2195	29.2927	29.2195	25.7317	19.8293	20.1707	22.6098	24.1463	22.3659	20.7073	20.2439	19.6585	18	18.4146	16.561	16.2927	16.3902	17.7317	17.6341	17.4878	15.0244	13.561	15.3659	13.7561	12.6585
	18	41.4878	38.9268	36.9268	35	35.3659	40.2439	40.2683	38.2195	34.878	34.2683	35.1463	32.561	31.1951	31.2195	31.0488	31.2439	32.6585	31.9756	31.0488	30.6585	30.9268	36.3659	33.1463	28.3171	24.561	21.8537	22.2439	21.1463	20.2195	20.5854	19.0732	20.2439	18.1707	15.9268	18.6585	18	16.9512	14.122	14.2439	15.1463	15.5366	19.7073	18.8293	15.6341	14.7805	16.0244	14.2195	10.3415
	19	45.9512	44.7073	49.4634	51.3415	49.0976	51.3659	54.5366	55.9512	56.4878	52.561	46.5366	47.8537	44	40.2439	39.8293	34.2195	31.4146	31.2195	28.9024	28.6098	24.6829	23.7073	23.561	25.439	23.7561	21.6829	22.8293	22.1463	20.6341	21.6585	21.1463	21.122	19.0244	18.878	20.6098	21.4634	18.878	18.1463	18.6585	17.2683	19.7561	18.6098	17.4634	16.0488	15.0488	15.2195	15.5854	14.439
	20	35.0244	36.439	38.5366	38.9512	38	40.9024	39.0732	34.9756	38.6341	39.5854	39.7073	36.7805	33.2439	30.6829	28.2927	25.8537	24.0976	21.5122	19.4878	20.3415	23.1707	25.8537	25.4146	23.3659	23.3902	20.9268	19.9512	19.7561	20.9268	23.3171	21	19.8293	20.0488	17.7561	15.0488	14.3171	11.3659	9.70732	11.3659	15.6585	16.3902	16.2683	17.2439	16.1951	11.6829	14.0976	16.2683	14.561
	21	38.561	44.1707	50.4878	56.3171	53.5854	47.122	45.2683	46.9024	47.2927	47.7073	43.2927	43.1951	41.9756	45.5854	42.1463	38.2195	33.9512	27.9024	24.8537	21.7805	19.1951	24.0244	24.6098	21.122	19.7561	20.9512	24.4634	21.0488	18.0732	17.2927	19.3415	20.5366	19.439	21.3659	22.1951	19.8293	17.0732	15.5122	16.6829	21.5122	18.9024	17.6341	18.6098	18.2195	15.2439	14.2439	16.2927	17.2683
	22	50.5366	55.5122	54.8293	50.3659	49.5366	49.3415	49.1951	47.9756	46.0976	46.2195	43.6341	42.5854	39.3902	35.9268	34.2927	32.5122	30.6098	33.3171	34.3415	27.9024	23.561	23.7317	23.8537	20.122	20.1951	20.8293	18.9268	17.5854	14.5122	15.5366	18.2927	17.5366	17.5854	16.8049	16.1707	16.6585	14.8049	17.6098	15.9512	15.5122	15.8293	15.0732	13.5854	11.8293	11.6341	12.1463	12.0488	11.9512
	23	41.2927	42.9268	40.2195	33.9268	31.4878	42.3171	47.878	48.1463	45.5122	39.7561	40.9268	35.7317	31.5122	30.2927	26.1951	22.7805	20.4634	18.3902	20.8293	23.1707	24.3415	24.7561	24.2439	20.8049	19.7317	16.439	14.3171	17.6098	21.0244	20.6585	18.5854	17.8293	18.1951	16.8049	15.4146	14.5122	14.8293	15.3902	11.7805	10.7561	14.3171	15.3659	15.1707	15.7073	14.9024	14.8049	15.6829	14.8049
	24	48.6341	50.0488	50.878	54.878	48.9756	48.2439	51.0244	49.4634	47.1951	47.122	44.4146	37.9756	32.2683	30.561	29.1463	27.5854	26.5854	29.561	26.9024	24.3902	23.122	21.9512	21.6098	22.0732	21.9756	21.0976	19.9756	16.9756	18.6098	17.9756	17.9024	18.8049	16.8049	16.439	17.8293	18.4146	17.3415	14.1951	15.8293	18	18.7317	18.1707	14.9268	13.9512	19.4146	16.9756	16.878	17.8537
	25	42.4146	44.5122	41.6098	41.2927	43	38.561	34.7317	32.7805	30.5366	30.3171	28.878	27.4878	26.6585	24.439	22.8537	22.6341	19.4878	19.6098	21.0732	19.0244	18.5366	19.0976	17.2195	17.6341	16.1463	16.9024	16.5122	19.1951	21.4878	18.7805	17.4146	17.5122	17.1463	16.3902	15.1951	15.8293	15.6098	14.4634	13.2927	17.0244	19.3171	16.7317	15.1951	16.8049	14.3171	10.9512	10.3415	10.6829
[truncated: 33 more columns]
