# Supplementary material for: A Fyn biosensor reveals pulsatile, spatially localized kinase activity and signaling crosstalk in live mammalian cells
Source: eLife. 2020 Feb 4;9:e50571. doi: 10.7554/eLife.50571 (PMC7000222; doi:10.7554/eLife.50571)
Supplement: Figure 8—figure supplement 1—source data 1. [file elife-50571-fig8-figsupp1-data1.xlsx]

## Sheet: Figure 8-figure supplement-1
						Figure 8-figure supplement-1-source data 1						Quantification of FRETT levels in untreated cells, followed by FAK inhibitor treatment and further treatment with PDGF
													FRETT intensity(a.u)[y-axis]
												Time(minutes)[x-axis]	cell-1	cell-2	cell-3
												1	36.0903	28.3743	29.0332	untreated
												2	31.8164	27.6695	28.1143
												3	36.073	27.8156	27.7117
												4	34.1184	26.7025	28.0274
												5	31.9091	26.81	26.8717
												6	29.4255	26.5112	27.7915
												7	35.8188	27.4396	27.6467
												8	33.8184	25.7281	28.0875
												9	33.508	26.7742	27.5717
												10	34.6094	26.456	27.358
												11	13.4227	17.5019	21.605	FAKi
												12	13.6522	16.6172	20.9676
												13	13.4294	16.6193	19.9679
												14	13.474	16.2526	19.7905
												15	13.2626	15.865	19.901
												16	13.8319	15.9781	19.8388
												17	11.7026	16.219	20.2111
												18	13.1844	16.4436	19.6191
												19	13.0248	15.3739	19.1294
												20	14.046	16.4517	20.1507
												21	13.1197	19.6204	19.9542	FAKi+PDGF
												22	13.5161	19.5233	20.7543
												23	15.2853	19.1448	20.2834
												24	14.8381	19.4029	20.3426
												25	13.9597	19.2794	19.7758
												26	10.7513	18.9461	19.4456
												27	11.6543	18.6774	18.7327
												28	13.0629	18.8074	18.3757
												29	12.7379	18.994	17.5676
												30	11.8727	18.4197	18.7876
