# Supplementary material for: A Fyn biosensor reveals pulsatile, spatially localized kinase activity and signaling crosstalk in live mammalian cells
Source: eLife. 2020 Feb 4;9:e50571. doi: 10.7554/eLife.50571 (PMC7000222; doi:10.7554/eLife.50571)
Supplement: Figure 8—source data 1. [file elife-50571-fig8-data1.xlsx]

## Sheet: Figure 8-source data 1
					Figure 8-source data 1					Quantification of PDGF-induced enhancement in fyn activity across different cellular zones
										B(I)					B(II)
											FRETT intensity(a.u)[y-axis]					PDGF induced FRETT enhancement(a.u)[y-axis]
										High FRETT zone[x-axis]	(-) PDGF	(+)PDGF			cell-zone[x-axis]	Low FRETT	High FRETT
											22.3067	24.9966				1.25688	2.68983
											9.9481	14.8167				0.982416	4.8686
											34.1099	40.5927				2.15245	6.48281
											38.9583	41.9613				1.03648	3.00297
											21.313	27.6977				0.444148	6.38469
											9.1328	26.7964				6.77594	17.6636
											24.5207	38.8415				5.11465	14.3207
											11.6149	18.6105				3.03716	6.99563
											9.20209	13.1539				2.06118	3.95181
											21.4619	22.9057				-0.682751	1.44377
											29.3966	32.0977				1.29164	2.70112
											23.1654	30.0052				0.528847	6.83979
											6.38983	16.4946				3.16832	10.1047
											21.9575	24.5746				2.5241	2.6171
											24.6146	28.4688				2.66248	3.85421
											27.4483	45.7041				9.65079	18.2558
											8.39652	43.1252				19.5516	34.7287
											12.1696	14.1374				1.09335	1.96782
											Avg= 19.7837	Avg=28.0544				Avg=3.48053	Avg= 8.27075
											S.e.m= 2.2531	S.e.m= 2.4848				S.e.m= 1.1121	S.e.m= 1.9772
