# Supplementary material for: A Fyn biosensor reveals pulsatile, spatially localized kinase activity and signaling crosstalk in live mammalian cells
Source: eLife. 2020 Feb 4;9:e50571. doi: 10.7554/eLife.50571 (PMC7000222; doi:10.7554/eLife.50571)
Supplement: Figure 8—source data 2. [file elife-50571-fig8-data2.xlsx]

## Sheet: Sheet1
						Figure 8-source data 2					Quantification of FRETT levels in untreated cells, followed by FAK inhibitor treatment and further treatment with PDGF
																			C (III)
								C (II)												Normalized FRETT intensity
									Time(minutes)[x-axis]	FRETT intensity(a.u)[y-axis]									Treatment[x-axis]	untreated	(+)FAKi	(+)FAKi(+)PDGF
										cell 1	cell 2	cell 3	cell 4	cell 5	Average	s.e.m				1	0.441523	0.534582
								untreated	1	41.5111	36.0903	28.3743	29.0332	23.7563	33.7522	3.12061				1	0.358828	0.357914
									2	39.1956	31.8164	27.6695	28.1143	22.6602	31.699	2.66615				1	0.588588	0.698523
									3	37.7501	36.073	27.8156	27.7117	21.6516	32.3376	2.66295				1	0.709607	0.667398
									4	39.5061	34.1184	26.7025	28.0274	20.7731	32.0886	2.953					Avg= 0.52463	Avg=0.564604
									5	37.6041	31.9091	26.81	26.8717	22.6942	30.7987	2.56382					S.e.m.= 0.0778	S.e.m.= 0.07752
									6	39.4797	29.4255	26.5112	27.7915	23.6024	30.802	2.9534
									7	38.9581	35.8188	27.4396	27.6467	21.19	32.4658	2.91375
									8	37.7617	33.8184	25.7281	28.0875	22.4211	31.3489	2.73028
									9	39.6734	33.508	26.7742	27.5717	21.9215	31.8818	3.00025
									10	38.7327	34.6094	26.456	27.358	25.0456	31.789	2.94736
								(+)FAKi	11	20.1985	13.4227	17.5019	21.605	9.07238	18.182	1.80039
									12	17.0776	13.6522	16.6172	20.9676	9.96517	17.0787	1.50214
									13	17.1468	13.4294	16.6193	19.9679	9.42457	16.7908	1.34007
									14	17.9703	13.474	16.2526	19.7905	9.17897	16.8719	1.34333
									15	18.0816	13.2626	15.865	19.901	8.9113	16.7776	1.43306
									16	12.9751	13.8319	15.9781	19.8388	9.03432	15.656	1.53064
									17	16.8439	11.7026	16.219	20.2111	10.1831	16.2442	1.74935
									18	14.5256	13.1844	16.4436	19.6191	9.41786	15.9432	1.39593
									19	19.2001	13.0248	15.3739	19.1294	9.68086	16.682	1.51154
									20	18.772	14.046	16.4517	20.1507	9.07711	17.3551	1.34129
								(+)FAKi,(+)PDGF	21	24.2665	13.1197	19.6204	19.9542	14.0017	19.2402	2.29815
									22	19.4358	13.5161	19.5233	20.7543	14.6492	18.3074	1.6252
									23	20.1579	15.2853	19.1448	20.2834	14.2119	18.7178	1.17224
									24	19.8866	14.8381	19.4029	20.3426	14.6418	18.6175	1.27433
									25	20.9286	13.9597	19.2794	19.7758	13.9519	18.4859	1.54776
									26	20.0442	10.7513	18.9461	19.4456	14.6639	17.2968	2.19334
									27	19.5279	11.6543	18.6774	18.7327	13.2451	17.1481	1.84154
									28	20.8691	13.0629	18.8074	18.3757	13.562	17.7788	1.66343
									29	21.8713	12.7379	18.994	17.5676	12.4283	17.7927	1.90787
									30	21.6283	11.8727	18.4197	18.7876	14.1659	17.6771	2.06334
