# Supplementary material for: A Fyn biosensor reveals pulsatile, spatially localized kinase activity and signaling crosstalk in live mammalian cells
Source: eLife. 2020 Feb 4;9:e50571. doi: 10.7554/eLife.50571 (PMC7000222; doi:10.7554/eLife.50571)
Supplement: Figure 9—source data 1. [file elife-50571-fig9-data1.xlsx]

## Sheet: Figure 9-source data 1
						Figure 9-source data 1					Quantification of correlation between membrane motility and Fyn activity across multiple U2OS cells
										B
										FRETT intensity(a.u)[x-axis]	membrane motility[y-axis]	s.e.m
										10.5	0.0605	0.00026453
										13.5	0.0627	0.00032599
										16.5	0.0629	0.00037374
										19.5	0.056	0.00041256
										22.5	0.0535	0.00048672
										25.5	0.055	0.00052352
										28.5	0.0516	0.00062242
										31.5	0.0536	0.00057829
										34.5	0.0554	0.00071189
										37.5	0.0515	0.00075043
										40.5	0.0455	0.0008731
										43.5	0.0535	0.0010415
										46.5	0.0546	0.0012148
										49.5	0.0447	0.0015418
										52.5	0.0348	0.0021028
										55.5	0.0308	0.0020353
